# Supplementary material for: Analysis of 142 genes resolves the rapid diversification of the rice genus
Source: PubMed Central journal article supplement (PMC2397501; doi:10.1186/gb-2008-9-3-r49), 2008-03-03
Supplement: gb-2008-9-3-r49-S2.pdf [file gb-2008-9-3-r49-S2.pdf]

**Additional data file 2.** The detailed information of each of 142 loci sampled in the present study, including length of the alignment after excluding ambiguously regions (L), proportions of exon and GC content, ratio of transition and transversion (ti/tv), mean pairwise divergence (p-distance) (MPD) and percent of variable (VS) and parsimony informative sites (IS) among all taxa and within *Oryza* species, respectively. ID, gene identity defined by authors based on its location on rice chromosomes (see Additional data file 1); BGI and TIGR, gene identity in BGI-RIS and TIGR database, respectively.

| ID   | Taxa   | L (bp) | Exon (%) | GC (%) | ti/tv | All taxa |        |        | <i>Oryza</i> species only |        |        | BGI                        | TIGR             |
|------|--------|--------|----------|--------|-------|----------|--------|--------|---------------------------|--------|--------|----------------------------|------------------|
|      |        |        |          |        |       | MPD (%)  | VS (%) | IS (%) | MPD (%)                   | VS (%) | IS (%) |                            |                  |
| 1-01 | ABCEFG | 810    | 24.81    | 40.11  | 1.71  | 9.79     | 26.79  | 5.43   | 8.81                      | 21.85  | 4.20   | OsIFCC000333 <sup>1)</sup> | LOC_Os01g05490.2 |
| 1-02 | ABCEFG | 887    | 17.14    | 34.89  | 1.10  | 13.35    | 31.57  | 9.81   | 12.11                     | 26.61  | 7.44   | OsIFCC000631               | LOC_Os01g09890.1 |
| 1-03 | ABCEFG | 694    | 43.08    | 39.99  | 1.26  | 10.05    | 25.07  | 6.05   | 8.67                      | 20.03  | 3.31   | OsIFCC000666               | LOC_Os01g10504.1 |
| 1-04 | ABCEFG | 802    | 15.71    | 35.29  | 1.72  | 12.24    | 30.92  | 6.98   | 11.10                     | 25.69  | 5.99   | OsIFCC000930               | LOC_Os01g13730.1 |
| 1-05 | ABCEFG | 575    | 33.39    | 44.98  | 1.39  | 11.01    | 26.44  | 8.17   | 9.96                      | 23.13  | 4.17   | OsIFCC001048               | LOC_Os01g15310.1 |
| 1-06 | ABCEFG | 726    | 66.80    | 46.81  | 1.18  | 9.18     | 23.28  | 6.75   | 7.90                      | 18.18  | 5.65   | OsIFCC001201               | LOC_Os01g17402.2 |
| 1-07 | ABCEFG | 1081   | 56.52    | 39.78  | 1.90  | 9.24     | 22.02  | 6.01   | 8.03                      | 18.13  | 4.63   | OsIFCC001788               | LOC_Os01g27730.1 |
| 1-08 | ABCEL  | 699    | 54.51    | 41.67  | 1.21  | 8.23     | 17.45  | 2.43   | 5.34                      | 9.44   | 1.00   | OsIFCC002478               | LOC_Os01g40670.2 |
| 1-09 | ABCEFG | 999    | 66.47    | 40.62  | 1.12  | 6.69     | 18.12  | 3.70   | 5.86                      | 14.11  | 3.00   | OsIFCC003044 <sup>2)</sup> | LOC_Os01g48960.1 |
| 1-10 | ABCEGL | 923    | 18.20    | 40.01  | 1.61  | 11.63    | 25.46  | 7.04   | 9.90                      | 19.72  | 4.01   | OsIFCC003102               | LOC_Os01g49690.1 |
| 1-11 | ABCEF  | 919    | 19.70    | 40.48  | 1.52  | 9.75     | 20.35  | 1.63   | 9.75                      | 20.35  | 1.63   | OsIFCC003263               | LOC_Os01g52110.9 |
| 1-12 | ABCEFG | 682    | 48.83    | 38.50  | 1.36  | 8.31     | 21.55  | 5.28   | 6.87                      | 16.28  | 3.96   | OsIFCC003329               | LOC_Os01g53020.1 |
| 1-13 | ABCEL  | 988    | 31.28    | 40.88  | 1.69  | 7.67     | 17.92  | 1.22   | 5.13                      | 9.82   | 0.91   | OsIFCC003449               | LOC_Os01g54910.1 |
| 1-14 | ABCEFG | 954    | 43.08    | 40.11  | 1.59  | 7.52     | 20.23  | 4.09   | 6.81                      | 16.77  | 3.15   | OsIFCC003502 <sup>3)</sup> | LOC_Os01g55540.2 |
| 1-15 | ABCEFG | 410    | 53.66    | 40.05  | 2.72  | 6.70     | 19.02  | 4.15   | 5.81                      | 14.63  | 2.93   | OsIFCC004159               | LOC_Os01g65220.1 |
| 1-16 | ABCEFG | 1565   | 72.65    | 47.74  | 2.41  | 8.05     | 21.34  | 6.01   | 7.16                      | 17.38  | 4.47   | OsIFCC004446 <sup>4)</sup> | LOC_Os01g69030.1 |
| 1-17 | ABCEFG | 275    | 100.00   | 52.62  | 1.52  | 4.73     | 13.09  | 4.00   | 4.05                      | 10.55  | 1.82   | OsIFCC004786 <sup>5)</sup> | LOC_Os01g73890.1 |

|      |        |      |        |       |      |       |       |      |       |       |      |                             |                  |
|------|--------|------|--------|-------|------|-------|-------|------|-------|-------|------|-----------------------------|------------------|
| 2-01 | ABCEFG | 704  | 44.46  | 39.76 | 1.23 | 11.59 | 29.69 | 6.96 | 10.67 | 25.57 | 5.54 | OsIFCC012188                | LOC_Os02g01350.1 |
| 2-02 | ABCEFG | 736  | 44.43  | 37.99 | 1.51 | 8.92  | 23.64 | 5.57 | 8.05  | 19.57 | 3.53 | OsIFCC012601                | LOC_Os02g06584.1 |
| 2-03 | ABCEFG | 804  | 22.01  | 36.06 | 1.24 | 12.22 | 30.97 | 8.58 | 11.03 | 25.37 | 6.34 | OsIFCC013243                | LOC_Os02g15900.1 |
| 2-04 | ABCEFG | 1645 | 63.34  | 41.19 | 1.31 | 10.24 | 25.41 | 7.96 | 9.50  | 22.13 | 5.90 | OsIFCC013341 <sup>6)</sup>  | LOC_Os02g17780.1 |
| 2-05 | ABCEFG | 1208 | 100.00 | 59.95 | 0.57 | 7.03  | 17.72 | 5.80 | 5.51  | 12.25 | 4.47 | OsIFCC013615 <sup>7)</sup>  | LOC_Os06g02019.1 |
| 2-06 | ABCEFL | 970  | 34.74  | 38.35 | 1.67 | 8.32  | 20.62 | 2.99 | 6.58  | 14.85 | 0.83 | OsIFCC014205                | LOC_Os02g33430.1 |
| 2-07 | ABCEFG | 672  | 71.73  | 54.49 | 1.61 | 8.01  | 20.09 | 4.76 | 5.45  | 13.24 | 2.68 | OsIFCC015762                | LOC_Os02g56130.1 |
| 2-08 | ABCEFG | 868  | 43.20  | 43.12 | 1.39 | 10.41 | 25.92 | 7.14 | 9.08  | 21.66 | 3.46 | OsIFCC015825 <sup>8)</sup>  | LOC_Os02g56850.2 |
| 2-09 | ABCEFG | 778  | 34.96  | 44.22 | 0.88 | 10.29 | 26.22 | 6.94 | 8.91  | 21.08 | 4.76 | OsIFCC015941                | LOC_Os02g58220.1 |
| 3-01 | ABCEFG | 1358 | 27.91  | 40.63 | 1.59 | 8.74  | 23.05 | 4.27 | 7.60  | 18.34 | 3.02 | OsIFCC005013                | LOC_Os03g03400.1 |
| 3-02 | ABCEFL | 891  | 24.92  | 38.76 | 1.42 | 10.36 | 24.02 | 3.93 | 8.68  | 17.62 | 1.46 | OsIFCC005115                | LOC_Os03g04460.1 |
| 3-03 | ABCEFG | 515  | 45.24  | 41.01 | 1.76 | 7.62  | 20.97 | 4.66 | 6.27  | 15.15 | 3.69 | OsIFCC005343                | LOC_Os03g07790.1 |
| 3-04 | ABCEFG | 1143 | 30.88  | 38.67 | 1.27 | 8.79  | 22.84 | 5.77 | 7.57  | 17.94 | 4.29 | OsIFCC005351                | LOC_Os03g07880.2 |
| 3-05 | ABCEFG | 558  | 35.13  | 38.23 | 1.15 | 10.84 | 28.32 | 7.53 | 9.02  | 21.15 | 4.48 | OsIFCC005617                | LOC_Os03g11614.1 |
| 3-06 | ABCEFG | 1243 | 38.29  | 39.48 | 1.75 | 7.85  | 20.43 | 4.83 | 6.96  | 16.73 | 3.70 | OsIFCC005760                | LOC_Os03g13614.1 |
| 3-07 | ABCEFG | 639  | 71.05  | 47.20 | 1.68 | 8.68  | 22.69 | 5.79 | 6.94  | 15.96 | 4.54 | OsIFCC005896                | LOC_Os03g15700.1 |
| 3-08 | ABCEFG | 823  | 28.31  | 36.95 | 1.37 | 10.41 | 26.12 | 6.80 | 9.30  | 20.90 | 5.10 | OsIFCC005909                | LOC_Os03g15860.1 |
| 3-09 | ABCEFG | 964  | 51.14  | 41.11 | 1.70 | 6.51  | 17.64 | 3.73 | 5.08  | 12.34 | 2.91 | OsIFCC006278                | LOC_Os03g20100.1 |
| 3-10 | ABCE   | 1318 | 58.27  | 46.63 | 1.12 | 4.36  | 8.04  | 0.38 | 4.36  | 8.04  | 0.38 | OsIFCC008113                | LOC_Os03g50540.1 |
| 3-11 | ABCE   | 815  | 42.82  | 43.33 | 3.13 | 5.41  | 10.18 | 1.47 | 5.41  | 10.18 | 1.47 | OsIFCC008323                | LOC_Os03g53750.1 |
| 3-12 | ABCEFG | 1129 | 36.94  | 39.60 | 1.19 | 10.42 | 26.40 | 7.71 | 8.98  | 20.99 | 4.96 | OsIFCC008803                | LOC_Os03g60939.1 |
| 3-13 | ABCEFG | 753  | 47.94  | 37.65 | 1.53 | 7.53  | 18.46 | 7.70 | 7.58  | 18.46 | 4.38 | OsIFCC009039                | LOC_Os03g63940.1 |
| 4-01 | ABCEFG | 624  | 81.89  | 48.65 | 1.66 | 4.84  | 12.66 | 4.33 | 4.31  | 10.42 | 2.72 | OsIFCC016083                | LOC_Os04g02900.1 |
| 4-02 | ABCEFG | 882  | 64.06  | 39.03 | 1.35 | 6.72  | 19.27 | 3.40 | 5.58  | 14.63 | 2.15 | OsIFCC016141                | LOC_Os04g04020.1 |
| 4-03 | ABCEFG | 976  | 27.97  | 35.72 | 1.66 | 9.19  | 24.59 | 5.02 | 8.21  | 19.57 | 4.00 | OsIFCC016261 <sup>9)</sup>  | LOC_Os04g08270.1 |
| 4-04 | ABCEFG | 694  | 83.57  | 42.83 | 1.42 | 7.28  | 19.60 | 4.90 | 5.89  | 13.98 | 3.75 | OsIFCC017591                | LOC_Os04g35510.2 |
| 4-05 | ABCEFG | 992  | 42.64  | 38.66 | 1.82 | 7.78  | 20.97 | 4.84 | 7.35  | 17.64 | 4.13 | OsIFCC017814 <sup>10)</sup> | LOC_Os04g39020.1 |
| 4-06 | ABCEFG | 675  | 41.33  | 39.91 | 1.49 | 9.07  | 23.11 | 5.19 | 8.04  | 18.67 | 3.70 | OsIFCC018163                | LOC_Os04g43300.1 |

|      |         |      |        |       |      |       |       |       |       |       |      |                             |                  |
|------|---------|------|--------|-------|------|-------|-------|-------|-------|-------|------|-----------------------------|------------------|
| 4-07 | ABCEFG  | 1191 | 20.57  | 35.98 | 1.10 | 9.82  | 22.84 | 5.04  | 9.82  | 22.84 | 5.04 | OsIFCC018239                | LOC_Os04g44430.1 |
| 4-08 | ABCEFGL | 738  | 65.58  | 39.75 | 1.98 | 8.16  | 21.95 | 5.42  | 6.87  | 17.07 | 3.39 | OsIFCC018391                | LOC_Os04g46450.1 |
| 4-09 | ABCEFGL | 1675 | 61.19  | 40.68 | 1.74 | 8.94  | 23.64 | 6.03  | 8.25  | 20.30 | 4.36 | OsIFCC018763 <sup>11)</sup> | LOC_Os04g52230.1 |
| 4-10 | ABCEFGL | 1089 | 22.41  | 36.48 | 1.37 | 13.19 | 31.77 | 7.71  | 11.78 | 27.18 | 5.51 | OsIFCC018831                | LOC_Os04g52760.1 |
| 4-11 | ABCEFGL | 685  | 48.03  | 38.44 | 1.11 | 7.36  | 19.71 | 5.11  | 6.78  | 16.64 | 3.80 | OsIFCC018940                | LOC_Os04g54340.1 |
| 4-12 | ABCEFGL | 798  | 38.85  | 52.78 | 1.24 | 7.92  | 21.30 | 4.76  | 6.48  | 15.66 | 3.38 | OsIFCC019034                | LOC_Os04g55560.3 |
| 5-01 | ABCEFGL | 299  | 100.00 | 51.41 | 1.13 | 2.85  | 7.02  | 1.00  | 2.21  | 5.02  | 0.33 | OsIFCC019404 <sup>12)</sup> | LOC_Os05g01710.3 |
| 5-02 | ABCEFGL | 731  | 57.73  | 38.34 | 1.81 | 6.72  | 19.29 | 3.69  | 6.19  | 15.87 | 2.74 | OsIFCC019474                | LOC_Os05g02670.1 |
| 5-03 | ABCEFGL | 867  | 23.53  | 39.34 | 1.58 | 10.38 | 26.07 | 6.69  | 9.10  | 20.65 | 4.84 | OsIFCC019652                | LOC_Os05g05260.1 |
| 5-04 | ABCEFG  | 674  | 24.48  | 40.33 | 1.83 | 10.33 | 24.78 | 3.86  | 10.33 | 24.78 | 3.86 | OsIFCC019756                | LOC_Os05g06690.1 |
| 5-05 | ABCEFGL | 813  | 41.94  | 39.16 | 1.22 | 12.48 | 29.89 | 10.46 | 11.02 | 25.46 | 6.27 | OsIFCC019936                | LOC_Os05g09490.1 |
| 5-06 | ABCEFGL | 671  | 64.68  | 36.82 | 2.07 | 7.33  | 18.33 | 5.81  | 6.35  | 15.05 | 4.62 | OsIFCC020049                | LOC_Os05g11850.1 |
| 5-07 | ABCEFGL | 898  | 27.06  | 35.17 | 1.59 | 10.50 | 26.95 | 6.57  | 9.78  | 22.61 | 5.12 | OsIFCC020589                | LOC_Os05g23260.1 |
| 5-08 | ABCEFGL | 985  | 80.91  | 41.17 | 2.35 | 5.91  | 15.84 | 4.37  | 5.49  | 13.71 | 2.94 | OsIFCC020611                | LOC_Os05g23600.2 |
| 5-09 | ABCEFGL | 810  | 53.33  | 41.21 | 1.59 | 8.38  | 21.73 | 6.05  | 7.27  | 17.41 | 4.32 | OsIFCC020613                | LOC_Os05g23620.4 |
| 5-10 | ABCEFGL | 859  | 42.96  | 38.71 | 1.83 | 7.88  | 21.65 | 4.66  | 6.40  | 15.72 | 3.38 | OsIFCC020758 <sup>13)</sup> | LOC_Os05g26890.4 |
| 5-11 | ABCEFGL | 264  | 100.00 | 48.70 | 1.60 | 10.48 | 23.49 | 14.39 | 7.99  | 20.46 | 2.65 | OsIFCC020966                | LOC_Os05g30530.1 |
| 5-12 | ABCEF   | 1194 | 72.95  | 43.87 | 1.58 | 6.67  | 14.07 | 4.10  | 6.67  | 14.07 | 4.10 | OsIFCC021563                | LOC_Os05g39850.1 |
| 5-13 | ACEFGL  | 951  | 34.70  | 39.77 | 1.34 | 9.18  | 21.98 | 5.15  | 8.34  | 16.72 | 3.79 | OsIFCC021824                | LOC_Os05g44310.1 |
| 5-14 | ABCE    | 690  | 37.97  | 41.59 | 2.18 | 4.56  | 8.55  | 1.45  | 4.56  | 8.55  | 1.45 | OsIFCC022111                | LOC_Os05g49230.1 |
| 6-01 | ABCFL   | 567  | 33.33  | 38.89 | 1.36 | 11.12 | 25.93 | 7.41  | 10.03 | 20.64 | 6.00 | OsIFCC009293                | LOC_Os06g03600.2 |
| 6-02 | ABCEFGL | 1037 | 15.53  | 37.72 | 1.52 | 12.33 | 29.32 | 10.03 | 10.99 | 24.78 | 7.62 | OsIFCC009322 <sup>14)</sup> | LOC_Os06g03990.1 |
| 6-03 | ABCEFGL | 732  | 88.52  | 57.84 | 1.78 | 6.05  | 14.34 | 6.83  | 4.88  | 10.66 | 5.06 | OsIFCC009337 <sup>15)</sup> | LOC_Os06g04200.4 |
| 6-04 | ABCEFGL | 996  | 34.14  | 40.84 | 1.46 | 11.46 | 28.92 | 8.53  | 9.80  | 22.89 | 5.22 | OsIFCC009509                | LOC_Os06g06030.2 |
| 6-05 | ABCEFGL | 1294 | 26.12  | 37.48 | 1.42 | 10.31 | 25.35 | 6.49  | 8.84  | 19.86 | 4.56 | OsIFCC009550 <sup>16)</sup> | LOC_Os06g06560.1 |
| 6-06 | ABCEFGL | 823  | 44.84  | 44.90 | 1.64 | 8.96  | 23.33 | 5.47  | 8.25  | 19.44 | 4.01 | OsIFCC009655                | LOC_Os06g08005.1 |
| 6-07 | ABCEFGL | 824  | 51.58  | 40.95 | 1.78 | 7.82  | 20.15 | 5.83  | 7.27  | 17.11 | 5.46 | OsIFCC010070                | LOC_Os06g13810.3 |
| 6-08 | ABCEFGL | 964  | 36.41  | 36.77 | 1.27 | 9.65  | 24.69 | 5.29  | 8.10  | 18.88 | 3.01 | OsIFCC010608                | LOC_Os06g24704.1 |

|      |        |      |        |       |      |       |       |      |       |       |      |                             |                  |
|------|--------|------|--------|-------|------|-------|-------|------|-------|-------|------|-----------------------------|------------------|
| 6-09 | ABCEFG | 1079 | 100.00 | 52.10 | 1.53 | 9.43  | 26.32 | 4.54 | 5.86  | 14.64 | 2.87 | OsIFCC011200 <sup>17)</sup> | LOC_Os06g37364.2 |
| 6-10 | ABCEFG | 791  | 46.52  | 39.91 | 1.58 | 9.36  | 24.78 | 7.59 | 8.22  | 20.10 | 4.93 | OsIFCC011734                | LOC_Os06g45000.2 |
| 6-11 | ABCEFG | 518  | 58.11  | 41.12 | 1.53 | 8.84  | 22.39 | 7.72 | 7.76  | 17.95 | 6.37 | OsIFCC011884                | LOC_Os06g46930.1 |
| 6-12 | ABCEG  | 1289 | 50.04  | 42.71 | 1.78 | 3.65  | 7.68  | 2.33 | 3.65  | 7.68  | 2.33 | OsIFCC011941                | LOC_Os06g47840.1 |
| 6-13 | ABCEFG | 742  | 49.19  | 42.98 | 1.72 | 8.41  | 22.91 | 4.99 | 6.98  | 16.98 | 2.83 | OsIFCC012135 <sup>18)</sup> | LOC_Os06g51150.2 |
| 7-01 | ABCEFG | 1362 | 49.05  | 41.66 | 2.11 | 7.79  | 18.58 | 4.41 | 7.79  | 18.58 | 4.41 | OsIFCC022658                | LOC_Os07g07060.1 |
| 7-02 | ABCEFG | 731  | 29.82  | 37.43 | 1.23 | 10.02 | 26.81 | 5.88 | 8.90  | 21.75 | 3.97 | OsIFCC022675                | LOC_Os07g07260.2 |
| 7-03 | ABCF   | 529  | 14.37  | 40.96 | 2.21 | 8.23  | 15.12 | 0.38 | 8.23  | 15.12 | 0.38 | OsIFCC022875                | LOC_Os07g10130.1 |
| 7-04 | ABCEG  | 1091 | 7.61   | 39.75 | 1.04 | 10.41 | 22.00 | 1.74 | 10.41 | 22.00 | 1.74 | OsIFCC022941                | LOC_Os07g11060.2 |
| 7-05 | ABCEFG | 1054 | 60.25  | 42.89 | 1.17 | 7.84  | 21.63 | 4.36 | 7.01  | 17.55 | 2.85 | OsIFCC023726                | LOC_Os07g31340.2 |
| 7-06 | ABCEFG | 1076 | 49.07  | 42.54 | 1.32 | 11.02 | 27.70 | 9.11 | 10.07 | 23.70 | 5.67 | OsIFCC024396                | LOC_Os07g42300.2 |
| 7-07 | ABCEFG | 938  | 42.75  | 38.55 | 1.88 | 9.49  | 24.20 | 6.40 | 8.08  | 19.19 | 3.63 | OsIFCC024429                | LOC_Os07g42810.2 |
| 7-08 | ABCEFG | 993  | 19.64  | 38.32 | 2.03 | 11.50 | 25.18 | 5.94 | 10.51 | 21.45 | 4.83 | OsIFCC024668                | LOC_Os07g46440.2 |
| 7-09 | ABCEFG | 457  | 50.33  | 41.82 | 1.28 | 10.34 | 25.82 | 8.97 | 9.21  | 21.23 | 7.00 | OsIFCC024700                | LOC_Os07g46750.1 |
| 8-01 | ABCEFG | 575  | 37.91  | 38.41 | 1.65 | 9.11  | 23.48 | 6.61 | 8.11  | 19.13 | 3.83 | OsIFCC024974                | LOC_Os08g01740.2 |
| 8-02 | ABCFL  | 1246 | 43.10  | 48.02 | 1.17 | 10.42 | 20.55 | 5.62 | 9.35  | 16.53 | 1.85 | OsIFCC025045                | LOC_Os08g02640.1 |
| 8-03 | ABCEFG | 691  | 50.07  | 44.72 | 2.00 | 8.75  | 21.42 | 7.96 | 7.78  | 17.66 | 5.93 | OsIFCC025228                | LOC_Os08g05830.1 |
| 8-04 | ABCEFG | 693  | 41.99  | 43.33 | 1.74 | 8.58  | 20.64 | 8.23 | 8.66  | 20.64 | 4.19 | OsIFCC025278                | LOC_Os08g06530.1 |
| 8-05 | ABCEFG | 575  | 38.61  | 41.20 | 1.51 | 9.13  | 23.65 | 5.39 | 8.35  | 20.00 | 4.17 | OsIFCC025286                | LOC_Os08g06630.4 |
| 8-06 | ABCG   | 735  | 68.30  | 49.13 | 1.59 | 3.67  | 6.53  | 1.77 | 3.67  | 6.53  | 1.77 | OsIFCC025775                | LOC_Os08g14450.1 |
| 8-07 | ABCEFG | 2082 | 57.78  | 40.80 | 1.44 | 5.36  | 13.55 | 2.69 | 5.36  | 13.55 | 2.69 | OsIFCC026144 <sup>19)</sup> | LOC_Os08g20660.2 |
| 8-08 | ABCEFG | 634  | 35.80  | 35.41 | 1.60 | 8.59  | 22.87 | 5.99 | 6.95  | 16.56 | 4.26 | OsIFCC026184 <sup>20)</sup> | LOC_Os08g22354.1 |
| 8-09 | ABCFL  | 590  | 15.76  | 39.96 | 1.08 | 14.23 | 31.02 | 8.81 | 11.77 | 22.54 | 6.44 | OsIFCC026346                | LOC_Os08g25460.1 |
| 8-10 | ABCEFG | 666  | 33.48  | 37.26 | 1.85 | 10.66 | 28.38 | 7.06 | 9.23  | 22.07 | 5.56 | OsIFCC026796                | LOC_Os08g33076.1 |
| 8-11 | ABCEFG | 772  | 72.67  | 56.06 | 1.24 | 7.94  | 21.76 | 4.40 | 7.32  | 18.14 | 3.37 | OsIFCC027043                | LOC_Os08g36790.1 |
| 8-12 | ABCEFG | 888  | 53.72  | 41.17 | 1.19 | 9.09  | 24.66 | 5.18 | 8.34  | 20.72 | 3.38 | OsIFCC027081                | LOC_Os08g37444.5 |
| 9-01 | ABCEFG | 460  | 41.96  | 37.99 | 0.98 | 7.85  | 20.00 | 6.09 | 6.68  | 15.65 | 4.57 | OsIFCC027859                | LOC_Os09g06499.1 |
| 9-02 | ABCEFG | 1238 | 66.64  | 45.52 | 2.38 | 6.21  | 17.12 | 3.31 | 5.05  | 12.84 | 2.18 | OsIFCC027894                | LOC_Os09g07300.1 |

|       |        |      |       |       |      |       |       |       |       |       |       |                             |                  |
|-------|--------|------|-------|-------|------|-------|-------|-------|-------|-------|-------|-----------------------------|------------------|
| 9-03  | ABCFGL | 1210 | 22.73 | 36.80 | 1.17 | 10.66 | 24.55 | 4.71  | 9.77  | 19.50 | 3.64  | OsIFCC027959                | LOC_Os09g08390.4 |
| 9-04  | ABCEFG | 590  | 51.53 | 36.42 | 1.61 | 8.58  | 22.20 | 7.29  | 7.89  | 18.31 | 6.10  | OsIFCC027996                | LOC_Os09g09480.2 |
| 9-05  | ABCEFG | 859  | 63.56 | 40.73 | 1.76 | 7.49  | 20.49 | 5.47  | 7.12  | 17.11 | 4.77  | OsIFCC028658                | LOC_Os09g22450.1 |
| 9-06  | ABCEGL | 1230 | 17.40 | 36.87 | 1.07 | 10.84 | 22.93 | 5.45  | 9.38  | 16.26 | 3.09  | OsIFCC028803                | LOC_Os09g25640.1 |
| 9-07  | ABCEFG | 1307 | 35.04 | 37.33 | 1.71 | 8.56  | 22.88 | 5.51  | 7.61  | 18.75 | 4.21  | OsIFCC029321                | LOC_Os09g33980.1 |
| 9-08  | ABCEFG | 793  | 61.54 | 42.04 | 1.67 | 8.11  | 20.43 | 7.31  | 6.96  | 16.27 | 5.68  | OsIFCC029322                | LOC_Os09g33986.2 |
| 9-09  | ABCEFG | 877  | 64.20 | 39.82 | 1.68 | 7.63  | 20.07 | 5.82  | 7.09  | 17.10 | 3.99  | OsIFCC029340                | LOC_Os09g34190.1 |
| 9-10  | ABCEFG | 443  | 61.17 | 49.82 | 1.25 | 7.18  | 17.38 | 6.77  | 6.31  | 14.45 | 4.06  | OsIFCC029466                | LOC_Os09g36800.1 |
| 10-01 | ABCEFG | 637  | 29.20 | 37.21 | 2.01 | 8.23  | 20.72 | 5.18  | 7.21  | 17.27 | 2.67  | OsIFCC030113                | LOC_Os10g10190.1 |
| 10-02 | ABCE   | 2086 | 19.13 | 42.11 | 1.37 | 5.65  | 10.07 | 1.92  | 5.65  | 10.07 | 1.92  | OsIFCC030157                | LOC_Os10g11140.1 |
| 10-03 | ABCE   | 754  | 23.87 | 42.74 | 2.13 | 4.68  | 8.62  | 0.27  | 4.68  | 8.62  | 0.27  | OsIFCC030576                | LOC_Os10g23120.1 |
| 10-04 | ABCEGL | 372  | 51.61 | 39.18 | 0.94 | 6.51  | 16.67 | 2.15  | 4.54  | 10.22 | 1.08  | OsIFCC030673                | LOC_Os10g25320.3 |
| 10-05 | ABCEFG | 1023 | 20.82 | 42.46 | 1.34 | 11.59 | 26.00 | 5.96  | 11.59 | 26.00 | 5.96  | OsIFCC030724                | LOC_Os10g26140.2 |
| 10-06 | ABCEFG | 748  | 43.58 | 40.72 | 1.26 | 7.84  | 19.92 | 6.15  | 6.90  | 16.18 | 3.61  | OsIFCC030908                | LOC_Os10g29660.1 |
| 10-07 | ABCEFG | 996  | 31.02 | 37.10 | 1.28 | 9.24  | 24.80 | 5.02  | 7.60  | 18.57 | 3.82  | OsIFCC031025                | LOC_Os10g31520.2 |
| 10-08 | ABCEFG | 453  | 25.83 | 37.08 | 1.21 | 11.89 | 31.57 | 6.40  | 10.48 | 24.72 | 4.64  | OsIFCC031142                | LOC_Os10g33270.1 |
| 10-09 | ABCEL  | 739  | 21.11 | 40.30 | 1.60 | 5.69  | 13.26 | 0.41  | 2.39  | 4.74  | 0.14  | OsIFCC031711                | LOC_Os10g41340.1 |
| 10-10 | ABCE   | 876  | 65.64 | 44.79 | 2.05 | 2.65  | 4.91  | 0.91  | 2.65  | 4.91  | 0.91  | OsIFCC031753                | LOC_Os10g41960.1 |
| 10-11 | ABCEFG | 603  | 0.00  | 38.23 | 1.55 | 12.23 | 30.85 | 6.80  | 10.48 | 24.38 | 5.31  | OsIFCC031807 <sup>21)</sup> | LOC_Os10g42720.1 |
| 11-01 | ABCEGL | 1158 | 33.07 | 40.00 | 1.60 | 8.15  | 19.52 | 4.49  | 6.55  | 14.51 | 1.21  | OsIFCC034196                | ---              |
| 11-02 | ABCEFG | 843  | 41.16 | 38.38 | 1.34 | 11.56 | 25.86 | 10.08 | 10.60 | 22.54 | 8.54  | OsIFCC034358                | LOC_Os11g07916.1 |
| 11-03 | ABCEFG | 937  | 63.39 | 45.81 | 1.56 | 8.11  | 20.60 | 7.47  | 7.25  | 16.65 | 5.55  | OsIFCC034489 <sup>22)</sup> | LOC_Os11g10480.2 |
| 11-04 | ABCEFG | 1109 | 53.56 | 47.93 | 1.21 | 8.94  | 22.54 | 7.48  | 8.22  | 19.30 | 5.86  | OsIFCC034491 <sup>23)</sup> | LOC_Os11g10510.1 |
| 11-05 | ABCEFG | 970  | 14.43 | 33.63 | 1.25 | 14.83 | 31.34 | 11.75 | 12.92 | 24.85 | 10.41 | OsIFCC034620                | LOC_Os11g13810.1 |
| 11-06 | ABCEFG | 689  | 18.72 | 37.78 | 1.21 | 11.85 | 26.27 | 6.82  | 11.85 | 26.27 | 6.82  | OsIFCC034777                | LOC_Os11g17610.1 |
| 11-07 | ABCEFG | 914  | 33.15 | 36.20 | 1.32 | 11.54 | 29.21 | 9.08  | 9.09  | 21.77 | 5.80  | OsIFCC035427                | LOC_Os11g33090.1 |
| 11-08 | ABCEFG | 844  | 15.76 | 34.69 | 1.43 | 9.51  | 23.58 | 7.82  | 8.99  | 19.79 | 6.64  | OsIFCC035472                | LOC_Os11g34200.2 |
| 11-09 | ABCE   | 1098 | 24.32 | 41.95 | 1.52 | 8.62  | 14.85 | 4.28  | 8.62  | 14.85 | 4.28  | OsIFCC035610                | LOC_Os11g36390.1 |

|       |         |        |       |       |      |       |       |      |       |       |      |                             |                  |
|-------|---------|--------|-------|-------|------|-------|-------|------|-------|-------|------|-----------------------------|------------------|
| 11-10 | ABCEFGL | 639    | 32.39 | 40.87 | 2.08 | 9.64  | 25.98 | 5.79 | 8.69  | 21.13 | 3.91 | OsIFCC035654                | LOC_Os11g37130.1 |
| 11-11 | ABCEFGL | 918    | 27.12 | 36.02 | 1.47 | 8.82  | 23.42 | 5.45 | 8.48  | 20.48 | 4.68 | OsIFCC035694                | LOC_Os11g38990.3 |
| 11-12 | ABCEFGL | 964    | 6.02  | 36.06 | 1.36 | 14.55 | 31.02 | 8.40 | 12.69 | 24.79 | 6.85 | OsIFCC035700                | LOC_Os11g38920.1 |
| 11-13 | ABCEFGL | 386    | 70.47 | 43.49 | 2.24 | 6.32  | 16.58 | 5.18 | 5.83  | 14.25 | 3.63 | OsIFCC035910                | LOC_Os11g43510.1 |
| 12-01 | ABCEFGL | 889    | 37.57 | 35.60 | 1.70 | 9.18  | 24.30 | 5.96 | 8.04  | 19.46 | 4.27 | OsIFCC032170                | LOC_Os12g06200.2 |
| 12-02 | ABCEFGL | 1088   | 51.01 | 39.27 | 1.36 | 11.46 | 28.40 | 9.74 | 10.44 | 23.90 | 7.17 | OsIFCC032605 <sup>24)</sup> | LOC_Os12g15470.1 |
| 12-03 | ABCFGL  | 631    | 17.27 | 38.53 | 1.23 | 11.78 | 25.04 | 5.07 | 11.05 | 21.24 | 3.49 | OsIFCC033021                | LOC_Os12g29660.1 |
| 12-04 | ABCEFGL | 683    | 38.80 | 36.12 | 1.58 | 9.35  | 24.31 | 5.86 | 7.81  | 18.74 | 3.66 | OsIFCC033140                | LOC_Os12g31810.1 |
| 12-05 | ABCEFGL | 787    | 63.91 | 38.05 | 1.56 | 6.75  | 17.92 | 4.57 | 6.19  | 15.12 | 2.92 | OsIFCC033292                | LOC_Os01g27750.1 |
| 12-06 | ABCEFGL | 777    | 30.63 | 35.68 | 1.55 | 10.80 | 27.80 | 6.18 | 10.20 | 23.81 | 5.41 | OsIFCC033332                | LOC_Os12g35570.3 |
| 12-07 | ABCEGL  | 478    | 69.87 | 48.60 | 1.74 | 4.82  | 12.13 | 2.93 | 3.97  | 9.21  | 1.05 | OsIFCC033336                | LOC_Os12g35630.1 |
| 12-08 | ABCEFGL | 1206   | 30.85 | 36.99 | 1.43 | 9.67  | 24.46 | 6.55 | 8.68  | 20.32 | 4.73 | OsIFCC033507                | LOC_Os12g38380.1 |
| 12-09 | ABCE    | 1495   | 31.91 | 42.86 | 1.23 | 5.07  | 9.70  | 0.20 | 5.07  | 9.70  | 0.20 | OsIFCC033909                | ---              |
| Total | ABCEFGL | 124079 | 43.10 | 41.07 | 1.40 | 9.22  | 21.63 | 5.44 | 8.13  | 17.76 | 3.95 | ---                         | ---              |

\* not available

1) ~ 24) stand for the 24 genes that were single copies demonstrated by the following studies:

1) *TPI* [1]; 2) *NADH-GOGAT* [2]; 3) *AATI* [3]; 4) *SPS* [4]; 5) *TFIIA $\gamma$ 1* [5]; 6) *CPSI* [6]; 7) *KAO* [6]; 8) *RGRC2* [7]; 9) *SDBE* [8]; 10) *BADH* [9]; 11) *KSI* [6]; 12) *TFIIA $\gamma$ 5* [5]; 13) *GPAT* [10]; 14) *ACS2* [11]; 15) *Waxy* [12]; 16) *SSSI* [13]; 17) *KO2* [6]; 18) *CatB* [14]; 19) *CEN6733* [15]; 20) *CEN6729* [15]; 21) *GPAT* [16]; 22) *Adh1* [17]; 23) *Adh2* [17]; 24) *CBPI* [18].

## References

1. Xu Y, Hall TC: **Cytosolic triosephosphate isomerase is a single gene in rice.** *Plant Physiol* 1993, **101**:683-687.
2. Goto S, Akagawa T, Kojima S, Hayakawa T, Yamaya T: **Organization and structure of NADH-dependent glutamate synthase**

- gene from rice plants.** *Biochimica et biophysica acta* 1998, **1387**:298-308.
3. Song J, Yamamoto K, Shomura A, Yano M, Minobe Y, Sasaki T: **Characterization and mapping of cDNA encoding aspartate aminotransferase in rice, *Oryza sativa* L.** *DNA Res* 1996, **3**:303-310.
  4. Sakamoto M, Satozawa T, Kishimoto N, Higo K, Shimada H, Fujimura T: **Structure and RFLP mapping of a rice sucrose phosphate synthase (SPS) gene that is specifically expressed in the source organ.** *Plant Sci* 1995, **112**:207-217.
  5. Blair MW, Garris AJ, Iyer AS, Chapman B, Kresovich S, McCouch SR: **High resolution genetic mapping and candidate gene identification at the xa5 locus for bacterial blight resistance in rice (*Oryza sativa* L.).** *Theor Appl Genet* 2003, **107**:62-73.
  6. Sakamoto T, Miura K, Itoh H, Tatsumi T, Ueguchi-Tanaka M, Ishiyama K, Kobayashi M, Agrawal GK, Takeda S, Abe K *et al.*: **An overview of gibberellin metabolism enzyme genes and their related mutants in rice.** *Plant Physiol* 2004, **134**:1642-1653.
  7. Kaminaka H, Morita S, Nakajima M, Masumura T, Tanaka K: **Gene cloning and expression of cytosolic glutathione reductase in rice (*Oryza sativa* L.).** *Plant Cell Physiol* 1998, **39**:1269-1280.
  8. Nakamura Y, Umemoto T, Ogata N, Kuboki Y, Yano M, Sasaki T: **Starch debranching enzyme (R-enzyme or pullulanase) from developing rice endosperm: purification, cDNA and chromosomal localization of the gene.** *Planta* 1996, **199**:209-218.
  9. Nakamura T, Yokota S, Muramoto Y, Tsutsui K, Oguri Y, Fukui K, Takabe T: **Expression of a betaine aldehyde dehydrogenase gene in rice, a glycinebetaine nonaccumulator, and possible localization of its protein in peroxisomes.** *Plant J* 1997, **11**:1115-1120.
  10. Seo HS, Kim HY, Jeong JY, Lee SY, Cho MJ, Bahk JD: **Molecular cloning and characterization of *RGAI* encoding a G protein alpha subunit from rice (*Oryza sativa* L. IR-36).** *Plant Mol Biol* 1995, **27**:1119-1131.
  11. Zarembinski TI, Theologis A: **Expression characteristics of *OS-ACS1* and *OS-ACS2*, two members of the 1-aminocyclopropane-1-carboxylate synthase gene family in rice (*Oryza sativa* L. cv. Habiganj Aman II) during partial submergence.** *Plant Mol Biol* 1997, **33**:71-77.
  12. Dian W, Jiang H, Chen Q, Liu F, Wu P: **Cloning and characterization of the granule-bound starch synthase II gene in rice: gene expression is regulated by the nitrogen level, sugar and circadian rhythm.** *Planta* 2003, **218**:261-268.
  13. Baba T, Nishihara M, Mizuno K, Kawasaki T, Shimada H, Kobayashi E, Ohnishi S, Tanaka K, Arai Y: **Identification, cDNA cloning, and gene expression of soluble starch synthase in rice (*Oryza sativa* L.) immature seeds.** *Plant Physiol* 1993, **103**:565-573.
  14. Iwamoto M, Maekawa M, Saito A, Higo H, Higo K: **Evolutionary relationship of plant catalase genes inferred from exon-intron structures: isozyme divergence after the separation of monocots and dicots.** *Theor Appl Genet* 1998, **97**:9-19.

15. Nagaki K, Cheng Z, Ouyang S, Talbert PB, Kim M, Jones KM, Henikoff S, Buell CR, Jiang J: **Sequencing of a rice centromere uncovers active genes.** *Nat Genet* 2004, **36**:138-145.
16. Yokoi S, Higashi S, Kishitani S, Murata N, Toriyama K: **Introduction of the cDNA for *Arabidopsis* glycerol-3-phosphate acyltransferase (GPAT) confers unsaturation of fatty acids and chilling tolerance of photosynthesis on rice.** *Mol Breed* 1998, **4**:269-275.
17. Xie Y, Wu R: **Rice alcohol dehydrogenase genes: anaerobic induction, organ specific expression and characterization of cDNA clones.** *Plant Mol Biol* 1989, **13**:53-68.
18. Washio K, Ishikawa K: **Organ-specific and hormone-dependent expression of genes for serine carboxypeptidases during development and following germination of rice grains.** *Plant Physiol* 1994, **105**:1275-1280.
