# Supplementary material for: Analysis of 142 genes resolves the rapid diversification of the rice genus
Source: PubMed Central journal article supplement (PMC2397501; doi:10.1186/gb-2008-9-3-r49), 2008-03-03
Supplement: gb-2008-9-3-r49-S3.pdf [file gb-2008-9-3-r49-S3.pdf]

**Additional data file 3.** GC content variation among lineages and Chi-square test for the concatenated data set. The capital letters under GC (%) indicate the genome types except that L stands for *Leersia tisserantii*.

| Data set         | No. sites (bp) | GC (%) |      |      |      |      |      |      |      |                       |
|------------------|----------------|--------|------|------|------|------|------|------|------|-----------------------|
|                  |                | A      | B    | C    | E    | F    | G    | L    | Mean | <i>P</i> <sup>*</sup> |
| All sites        | 124,079        | 40.1   | 40.1 | 40.1 | 40.1 | 40.6 | 40.5 | 40.2 | 40.2 | 0.6766                |
| Intron           | 70,600         | 34.6   | 34.6 | 34.6 | 34.7 | 34.6 | 34.8 | 34.5 | 34.7 | 0.9998                |
| Exon             | 53,479         | 46.9   | 46.9 | 46.9 | 46.7 | 47.4 | 47.0 | 46.6 | 46.9 | 0.9420                |
| 1st codon        | 17,828         | 55.0   | 55.0 | 54.9 | 54.9 | 55.0 | 55.0 | 54.6 | 54.9 | 0.9998                |
| 2nd codon        | 17,827         | 39.8   | 39.7 | 39.7 | 39.8 | 39.8 | 39.7 | 39.9 | 39.8 | 1.0000                |
| 3rd codon        | 17,824         | 45.8   | 45.7 | 46.0 | 45.4 | 47.3 | 46.2 | 45.4 | 46.0 | 0.3463                |
| Intron+3rd codon | 88,424         | 37.0   | 37.0 | 37.1 | 37.0 | 37.5 | 37.4 | 37.0 | 37.1 | 0.8376                |

\* Pairwise  $\chi^2$  tests.
