# Supplementary material for: Analysis of 142 genes resolves the rapid diversification of the rice genus
Source: PubMed Central journal article supplement (PMC2397501; doi:10.1186/gb-2008-9-3-r49), 2008-03-03
Supplement: gb-2008-9-3-r49-S6.pdf [file gb-2008-9-3-r49-S6.pdf]

**Additional data file 6.** Summary of 14 alternative models used when Bayesian inferences were conducted. The models contained 11 homogeneous models and three mixed models in which parameters were unlinked across partitions. The number of active parameters and harmonic means of model likelihood were listed. JC = Jukes-Cantor model; HKY = Hasegawa-Kishino-Yano model; GTR = general time reversible model; I = proportion of invariant sites;  $\Gamma$  = gamma rate distribution; covarion = covarion-like model in Mrbayes; 4 process partition = intron + 1st codon position + 2nd codon position + 3rd codon position; 2 process partition = intron + exon; 142 gene partition = partitions by gene boundaries.

| Model category    | Model               | Harmonic mean<br>(in decreasing order) | No. of active<br>parameters |
|-------------------|---------------------|----------------------------------------|-----------------------------|
| mixed models      | 4 process partition | -328024.03                             | 16                          |
| mixed models      | 2 process partition | -332339.84                             | 10                          |
| mixed models      | 142 gene partition  | -336533.69                             | 410                         |
| homogeneous model | GTR+covarion        | -337703.76                             | 5                           |
| homogeneous model | HKY+covarion        | -337797.42                             | 5                           |
| homogeneous model | GTR+ $\Gamma$ +I    | -337808.09                             | 6                           |
| homogeneous model | GTR+ $\Gamma$       | -337808.23                             | 5                           |
| homogeneous model | GTR+I               | -337832.36                             | 5                           |
| homogeneous model | HKY+ $\Gamma$       | -337903.95                             | 5                           |
| homogeneous model | HKY+ $\Gamma$ +I    | -337905.39                             | 6                           |
| homogeneous model | HKY+I               | -337922.85                             | 5                           |
| homogeneous model | GTR                 | -339606.91                             | 4                           |
| homogeneous model | HKY                 | -339717.15                             | 4                           |
| homogeneous model | JC                  | -344589.77                             | 3                           |
