# Supplementary material for: Analysis of 142 genes resolves the rapid diversification of the rice genus
Source: PubMed Central journal article supplement (PMC2397501; doi:10.1186/gb-2008-9-3-r49), 2008-03-03
Supplement: gb-2008-9-3-r49-S7.pdf [file gb-2008-9-3-r49-S7.pdf]

**Additional data file 7.** Effect of model components on model fit judged by Bayes factor comparisons of competing models.

| Model component                | Paired models for comparison |                     | Harmonic means of models |            | Bayes factor    |                  |
|--------------------------------|------------------------------|---------------------|--------------------------|------------|-----------------|------------------|
|                                | Model_0                      | Model_1             | Model_0                  | Model_1    | $\log_e B_{10}$ | $2\log_e B_{10}$ |
| Rate variation across sites    | HKY                          | HKY+ $\Gamma$       | -339717.15               | -337903.95 | 1813.20         | 3626.40          |
| Rate variation across sites    | GTR                          | GTR+ $\Gamma$       | -339606.91               | -337808.23 | 1798.68         | 3597.36          |
| Rate variation across sites    | HKY                          | HKY+I               | -339717.15               | -337922.85 | 1794.30         | 3588.60          |
| Rate variation across sites    | GTR                          | GTR+I               | -339606.91               | -337832.36 | 1774.55         | 3549.10          |
| Rate variation across the tree | HKY                          | HKY+covarion        | -339717.15               | -337797.42 | 1919.73         | 3839.46          |
| Rate variation across the tree | GTR                          | GTR+covarion        | -339606.91               | -337703.76 | 1903.15         | 3806.30          |
| Substitution rates             | HKY                          | GTR                 | -339717.15               | -339606.91 | 110.24          | 220.48           |
| Substitution rates             | HKY+ $\Gamma$                | GTR+ $\Gamma$       | -337903.95               | -337808.23 | 95.72           | 191.44           |
| Substitution rates             | HKY+ $\Gamma$ +I             | GTR+ $\Gamma$ +I    | -337905.39               | -337808.09 | 97.30           | 194.60           |
| Rate variation across sites    | HKY+ $\Gamma$                | HKY+ $\Gamma$ +I    | -337903.95               | -337905.39 | -1.44           | -2.88            |
| Rate variation across sites    | GTR+ $\Gamma$                | GTR+ $\Gamma$ +I    | -337808.23               | -337808.09 | 0.14            | 0.28             |
| Rate variation across sites    | HKY+I                        | HKY+ $\Gamma$ +I    | -337922.85               | -337905.39 | 17.46           | 34.92            |
| Rate variation across sites    | GTR+I                        | GTR+ $\Gamma$ +I    | -337832.36               | -337808.09 | 24.27           | 48.54            |
| Data partition                 | 2 process partition          | 4 process partition | -332339.84               | -328024.03 | 4315.81         | 8631.62          |
| Data partition                 | 142 gene partition           | 2 process partition | -336533.69               | -332339.84 | 4193.85         | 8387.70          |
| Data partition                 | GTR+covarion                 | 142 gene partition  | -337703.76               | -336533.69 | 1170.07         | 2340.14          |

|                |              |                     |            |            |         |          |
|----------------|--------------|---------------------|------------|------------|---------|----------|
| Data partition | GTR+covarian | 4 process partition | -337703.76 | -328024.03 | 9679.73 | 19359.46 |
|----------------|--------------|---------------------|------------|------------|---------|----------|

Notes: Bayes factor in favor of model<sub>1</sub> over model<sub>0</sub> is denoted by  $B_{10}$ . Bayes factor comparisons indicated that among most of competing model pairs, model<sub>1</sub> got a significantly great improvement in model fit compared to model<sub>0</sub>. For homogeneous models, models assuming rates varying across sites or across the tree got extraordinarily high supports by over 3500 log likelihood units relative to corresponding ones with equal rates, and allowing nucleotide substitution under GTR model was favoured over HKY model with about 200 log likelihood units, which is also far above the threshold of 10 log likelihood units for the very strong evidence in favour of the better model [1]. For mixed models, those accounting for the heterogeneity across two process partitions outperformed that accounting for the heterogeneity across 142 gene partitions by 8387.7 log likelihood units, and a dramatic increase of 8631.62 log likelihood units was obtained when partitioning the data from 2 partitions into 4 partitions by functional constrains.

## References

1. Kass RE, Raftery AE: **Bayes factors**. *J Am Stat Assoc* 1995, **90**:773-795.
