# Supplementary material for: Analysis of 142 genes resolves the rapid diversification of the rice genus
Source: PubMed Central journal article supplement (PMC2397501; doi:10.1186/gb-2008-9-3-r49), 2008-03-03
Supplement: gb-2008-9-3-r49-S9.pdf [file gb-2008-9-3-r49-S9.pdf]

**Additional data file 9.** Results of incongruence length difference (ILD) test for pairwise comparisons of process partitions. Numbers in each cell is the *P* value of ILD test between row and column.

| <b>Partition</b> | 1st codon | 2nd codon | 3rd codon | Intron | Exon  |
|------------------|-----------|-----------|-----------|--------|-------|
| 2nd codon        | 0.273     |           |           |        |       |
| 3rd codon        | 0.203     | 0.171     |           |        |       |
| Intron           | 0.062     | 0.102     | 0.999     |        |       |
| All the rest     | 0.057     | 0.140     | 0.999     | 0.109  | 0.109 |
