# Supplementary material for: Analysis of 142 genes resolves the rapid diversification of the rice genus
Source: PubMed Central journal article supplement (PMC2397501; doi:10.1186/gb-2008-9-3-r49), 2008-03-03
Supplement: gb-2008-9-3-r49-S10.pdf [file gb-2008-9-3-r49-S10.pdf]

**Additional data file 10.** Number of genes that failed the ILD test with the target gene at  $P < 0.01$  for total, intron, exon and the 3rd codon sites, respectively, and the  $P$  value of ILD test between the target gene and all the rest of genes. Each of 39 genes (bold face) were significantly incongruent with the remaining genes ( $P < 0.01$ ).

| ID *         | Total | Intron           | Exon | 3rd codon | $P$ value |
|--------------|-------|------------------|------|-----------|-----------|
| <b>9-05</b>  | 121   | 102              | 46   | 13        | 0.001     |
| <b>4-01</b>  | 119   | 72               | 89   | 66        | 0.001     |
| <b>8-08</b>  | 119   | 114              | 53   | 12        | 0.001     |
| <b>11-07</b> | 105   | 84               | 21   | 14        | 0.001     |
| <b>2-03</b>  | 104   | 80               | 0    | 0         | 0.001     |
| <b>11-05</b> | 103   | 87               | 0    | 0         | 0.001     |
| <b>10-08</b> | 97    | 84               | 0    | 0         | 0.001     |
| <b>6-05</b>  | 93    | 78               | 5    | 2         | 0.001     |
| <b>11-08</b> | 93    | 81               | 4    | 2         | 0.001     |
| <b>3-08</b>  | 92    | 84               | 2    | 1         | 0.007     |
| <b>7-01</b>  | 92    | 76               | 16   | 10        | 0.001     |
| <b>11-12</b> | 89    | 76               | 1    | 0         | 0.001     |
| 8-04         | 84    | 69               | 9    | 6         | 0.454     |
| 9-09         | 83    | 56               | 22   | 13        | 0.096     |
| <b>5-03</b>  | 82    | 70               | 1    | 0         | 0.001     |
| <b>11-02</b> | 78    | 88               | 11   | 13        | 0.001     |
| <b>6-10</b>  | 77    | 81               | 4    | 4         | 0.002     |
| <b>9-04</b>  | 75    | 63               | 1    | 0         | 0.001     |
| <b>7-08</b>  | 74    | 60               | 0    | 0         | 0.001     |
| <b>7-07</b>  | 73    | 46               | 1    | 1         | 0.001     |
| <b>6-07</b>  | 68    | 42               | 24   | 18        | 0.001     |
| <b>4-05</b>  | 67    | 61               | 8    | 0         | 0.001     |
| 3-13         | 66    | 57               | 16   | 9         | 0.999     |
| <b>12-06</b> | 65    | 25               | 18   | 2         | 0.002     |
| <b>6-12</b>  | 63    | 54               | 0    | 0         | 0.001     |
| 1-05         | 59    | 43               | 1    | 0         | 0.214     |
| 4-09         | 56    | 21               | 25   | 16        | 0.26      |
| <b>9-02</b>  | 55    | 5                | 9    | 7         | 0.03      |
| <b>5-11</b>  | 52    | --- <sup>†</sup> | 17   | 14        | 0.001     |
| <b>1-10</b>  | 50    | 36               | 0    | 0         | 0.001     |
| 2-08         | 50    | 46               | 11   | 5         | 1         |
| <b>5-07</b>  | 50    | 35               | 2    | 1         | 0.01      |
| <b>11-11</b> | 50    | 34               | 2    | 0         | 0.004     |
| <b>12-02</b> | 50    | 46               | 12   | 2         | 0.001     |
| 1-01         | 47    | 38               | 0    | 0         | 0.399     |
| <b>5-12</b>  | 47    | 26               | 9    | 2         | 0.001     |

|              |    |    |    |    |       |
|--------------|----|----|----|----|-------|
| <b>7-02</b>  | 47 | 36 | 1  | 1  | 0.044 |
| 4-10         | 45 | 46 | 1  | 1  | 0.079 |
| 8-12         | 44 | 43 | 4  | 1  | 0.064 |
| 1-02         | 43 | 30 | 1  | 1  | 0.999 |
| 11-06        | 43 | 35 | 3  | 1  | 1     |
| <b>6-13</b>  | 41 | 31 | 13 | 10 | 0.046 |
| 1-14         | 40 | 35 | 3  | 2  | 0.196 |
| 3-01         | 39 | 24 | 6  | 1  | 0.094 |
| 4-08         | 39 | 36 | 11 | 5  | 0.447 |
| 9-06         | 39 | 32 | 1  | 0  | 0.637 |
| <b>10-01</b> | 38 | 26 | 0  | 0  | 0.005 |
| 3-06         | 37 | 24 | 6  | 1  | 0.066 |
| <b>8-06</b>  | 37 | 26 | 1  | 0  | 0.001 |
| <b>12-01</b> | 37 | 18 | 3  | 1  | 0.007 |
| 3-07         | 36 | 10 | 4  | 5  | 0.077 |
| 9-08         | 36 | 29 | 8  | 5  | 0.999 |
| 7-06         | 35 | 13 | 6  | 6  | 0.138 |
| 8-05         | 35 | 26 | 0  | 4  | 0.393 |
| <b>10-02</b> | 35 | 30 | 0  | 0  | 0.001 |
| 12-08        | 35 | 24 | 2  | 1  | 0.772 |
| 6-08         | 34 | 22 | 1  | 0  | 0.316 |
| 8-11         | 34 | 19 | 2  | 1  | 0.415 |
| 8-10         | 33 | 17 | 3  | 1  | 0.578 |
| 4-06         | 32 | 20 | 1  | 0  | 1     |
| 11-10        | 32 | 19 | 11 | 0  | 0.41  |
| 2-01         | 31 | 31 | 3  | 1  | 0.409 |
| 2-02         | 31 | 19 | 0  | 0  | 0.592 |
| 2-07         | 31 | 9  | 0  | 0  | 0.261 |
| 9-10         | 30 | 5  | 2  | 1  | 0.178 |
| 4-07         | 29 | 29 | 2  | 1  | 1     |
| 6-02         | 29 | 26 | 1  | 0  | 0.205 |
| 12-03        | 29 | 30 | 0  | 0  | 0.242 |
| 12-04        | 29 | 21 | 2  | 1  | 1     |
| <b>1-04</b>  | 28 | 14 | 0  | 0  | 0.049 |
| 1-16         | 28 | 32 | 4  | 2  | 0.717 |
| 5-09         | 28 | 25 | 5  | 3  | 1     |
| 10-05        | 28 | 32 | 2  | 1  | 1     |
| 3-04         | 27 | 23 | 6  | 3  | 0.224 |
| 5-10         | 27 | 8  | 5  | 1  | 1     |
| 6-03         | 26 | 6  | 3  | 2  | 0.598 |
| 12-05        | 26 | 8  | 2  | 2  | 0.266 |
| 6-11         | 25 | 13 | 6  | 1  | 1     |
| 11-09        | 25 | 26 | 0  | 0  | 1     |
| 1-06         | 24 | 32 | 4  | 1  | 1     |

|             |    |     |     |     |       |
|-------------|----|-----|-----|-----|-------|
| 2-04        | 24 | 36  | 4   | 5   | 1     |
| 4-02        | 24 | 6   | 3   | 3   | 1     |
| 10-07       | 24 | 20  | 0   | 0   | 1     |
| <b>1-12</b> | 23 | 24  | 3   | 3   | 0.032 |
| 4-03        | 22 | 25  | 4   | 3   | 0.758 |
| 2-05        | 21 | --- | 5   | 1   | 0.439 |
| 5-13        | 20 | 12  | 1   | 1   | 0.18  |
| 10-10       | 20 | 7   | 0   | 0   | 1     |
| 3-09        | 19 | 25  | 1   | 1   | 0.626 |
| 3-05        | 18 | 12  | 3   | 2   | 0.797 |
| 4-04        | 18 | 9   | 5   | 1   | 0.625 |
| 5-04        | 18 | 5   | 0   | 0   | 0.811 |
| 6-06        | 18 | 7   | 31  | 5   | 0.056 |
| 9-07        | 18 | 18  | 3   | 2   | 0.236 |
| 1-07        | 17 | 25  | 2   | 1   | 0.118 |
| 3-03        | 17 | 17  | 2   | 4   | 1     |
| <b>3-11</b> | 17 | 6   | 0   | 0   | 0.025 |
| 4-11        | 17 | 4   | 5   | 3   | 0.163 |
| 10-11       | 17 | 17  | --- | --- | 0.799 |
| 11-04       | 17 | 21  | 1   | 1   | 1     |
| 1-08        | 16 | 7   | 1   | 0   | 1     |
| 5-08        | 15 | 11  | 2   | 0   | 0.118 |
| 7-04        | 15 | 16  | 0   | 0   | 0.999 |
| 8-03        | 15 | 18  | 3   | 1   | 0.423 |
| 11-03       | 15 | 3   | 5   | 1   | 0.114 |
| 1-09        | 13 | 12  | 2   | 0   | 0.293 |
| 2-09        | 13 | 3   | 2   | 5   | 1     |
| 5-06        | 12 | 13  | 1   | 0   | 0.239 |
| 5-14        | 12 | 12  | 0   | 0   | 0.077 |
| 1-13        | 11 | 5   | 0   | 0   | 0.784 |
| 1-15        | 11 | 11  | 0   | 0   | 0.074 |
| 4-12        | 11 | 6   | 0   | 0   | 0.431 |
| 6-04        | 11 | 4   | 2   | 4   | 0.782 |
| 9-01        | 11 | 6   | 0   | 0   | 1     |
| 3-10        | 10 | 4   | 0   | 0   | 0.495 |
| 6-09        | 10 | --- | 2   | 1   | 0.227 |
| 3-12        | 9  | 3   | 3   | 1   | 0.596 |
| 7-05        | 9  | 7   | 5   | 2   | 0.601 |
| 9-03        | 9  | 2   | 0   | 0   | 0.244 |
| 11-13       | 9  | 2   | 0   | 0   | 0.356 |
| 1-17        | 8  | --- | 3   | 0   | 1     |
| 5-05        | 8  | 7   | 3   | 1   | 0.178 |
| 7-09        | 7  | 12  | 3   | 2   | 0.334 |
| 10-04       | 7  | 3   | 0   | 0   | 0.354 |

|       |   |     |    |   |       |
|-------|---|-----|----|---|-------|
| 11-01 | 7 | 10  | 3  | 1 | 0.458 |
| 1-03  | 6 | 5   | 12 | 1 | 1     |
| 2-06  | 6 | 3   | 0  | 0 | 0.62  |
| 8-07  | 6 | 5   | 3  | 2 | 0.709 |
| 8-09  | 6 | 5   | 0  | 0 | 0.209 |
| 1-11  | 5 | 3   | 0  | 0 | 0.759 |
| 3-02  | 5 | 0   | 0  | 0 | 0.775 |
| 8-01  | 5 | 3   | 1  | 0 | 1     |
| 5-02  | 4 | 4   | 2  | 3 | 0.44  |
| 6-01  | 4 | 3   | 1  | 1 | 1     |
| 10-06 | 4 | 9   | 2  | 1 | 0.807 |
| 5-01  | 2 | --- | 0  | 0 | 0.55  |
| 8-02  | 2 | 0   | 0  | 0 | 0.627 |
| 12-07 | 2 | 1   | 1  | 0 | 1     |
| 10-03 | 1 | 1   | 0  | 0 | 1     |
| 12-09 | 1 | 1   | 0  | 0 | 1     |
| 7-03  | 0 | 0   | 0  | 0 | 1     |
| 10-09 | 0 | 0   | 0  | 0 | 1     |

---

\* Numbers indicates the relative location on rice chromosomes of the genes (Additional data file 1) and arranged by the degree of significant incongruence each has with the other 141 genes in descending order.

† not available
