# Supplementary material for: Analysis of 142 genes resolves the rapid diversification of the rice genus
Source: PubMed Central journal article supplement (PMC2397501; doi:10.1186/gb-2008-9-3-r49), 2008-03-03
Supplement: gb-2008-9-3-r49-S11.pdf [file gb-2008-9-3-r49-S11.pdf]

**Additional data file 11.** The topologies of bootstrap 75% majority-rule consensus trees by different methods of analyses for each gene.

| <b>ID*</b> | <b>ML</b>                       | <b>MP</b>                       | <b>ML (RY-coding)</b>         | <b>NJ (LogDet distance)</b>     |
|------------|---------------------------------|---------------------------------|-------------------------------|---------------------------------|
| 1-01       | (((((A, B), C), E), F, G), L)   | (((((A, B), C), E), G), F), L)  | ((((A, B), C), E, F, G), L)   | (((((A, B), C), E), F, G), L)   |
| 1-02       | (((((A, B), C, E), F), G), L)   | (((((A, B), C, E), F), G), L)   | (((((A, B), C, E), F), G), L) | (((((A, B), C, E), F), G), L)   |
| 1-03       | ((((A, B, C), E), F, G), L)     | ((((A, B, C), E), F, G), L)     | ((A, B, C, E), F, G), L)      | (((((A, B), C), E), F, G), L)   |
| 1-04       | ((A, B, C, E), (F, G)), L)      | ((A, B, C, E), (F, G)), L)      | ((A, (B, C, E)), F, G), L)    | ((A, B, C, E), F, G), L)        |
| 1-05       | ((((A, (B, C), E), F), G), L)   | ((((A, (B, C), E)), F), G), L)  | ((A, B, C, E, F), G), L)      | ((((A, B, C, E), F), G), L)     |
| 1-06       | (((((A, B), C), E), F, G), L)   | (((((A, B), C), E), F, G), L)   | ((((A, B), C, E), F, G), L)   | (((((A, B), C), E), F, G), L)   |
| 1-07       | ((A, B, C, E), F, G), L)        | ((A, (B, C, E)), F, G), L)      | ((A, B, C, E), G, F), L)      | ((A, B, C, E), F, G), L)        |
| 1-08       | ((((A, B), C), E), L)           | ((((A, B), C), E), L)           | (A, B, C, E), L)              | (A, B, C, E), L)                |
| 1-09       | ((((A, B, C), E), F, G), L)     | ((A, B, C, E), F, G), L)        | ((((A, B, C), E), F, G), L)   | ((((A, B, C), E), F, G), L)     |
| 1-10       | ((((A, C), (B, E)), G), L)      | ((((A, C), B, E), G), L)        | ((((A, C), B, E), G), L)      | ((((A, C), B, E), G), L)        |
| 1-11       | ((A, B), C, E), F)              | (A, B, C, E), F)                | ((A, B), C, E), F)            | (A, B, C, E), F)                |
| 1-12       | (((((A, B, C), E), G), F), L)   | (((((A, B, C), E), G), F), L)   | ((((A, B, C, E), G), F), L)   | (((((A, B, C), E), G), F), L)   |
| 1-13       | ((A, B), C, E), L)              | ((A, B), C, E), L)              | (A, B, E, C), L)              | ((A, B), C, E), L)              |
| 1-14       | (((((A, C), B), E), F, G), L)   | (((((A, C), B), E), F, G), L)   | ((A, C, B), E, F, G), L)      | (((((A, C), B), E), F, G), L)   |
| 1-15       | ((A, B, C, E), F, G), L)        | ((((A, B, C, E), G), F), L)     | ((A, B, C, E), F, G), L)      | ((A, B, C, E, G), F), L)        |
| 1-16       | ((((A, B), C, E), F, G), L)     | ((((A, B), C), E, F, G), L)     | ((((A, B), C, E), F, G), L)   | ((((A, B), C, E), F, G), L)     |
| 1-17       | (A, B, C, E, F, G), L)          | ((A, B), C, E, F, G), L)        | (A, C, E, F, G, B), L)        | ((((A, B), C), E, F, G), L)     |
| 2-01       | ((((A, B), (C, E)), F, G), L)   | ((((A, B), (C, E)), F, G), L)   | ((A, B, (C, E)), F, G), L)    | ((((A, B), (C, E)), F, G), L)   |
| 2-02       | (((((A, B, C), E), F), G), L)   | (((((A, B, C), E), F), G), L)   | (((((A, B, C), E), F), G), L) | (((((A, B, C), E), F), G), L)   |
| 2-03       | (((((A, E), (B, C)), F), G), L) | (((((A, E), (B, C)), F), G), L) | ((A, E), (B, C), F, G), L)    | (((((A, E), (B, C)), F), G), L) |
| 2-04       | ((((A, B, C), E), F, G), L)     | ((((A, B, C), E), F, G), L)     | ((((A, B, C), E), F, G), L)   | ((((A, B, C), E), F, G), L)     |
| 2-05       | ((((A, B, C), E), (F, G)), L)   | ((A, B, C, E), (F, G)), L)      | (A, B, C, E, F, G), L)        | ((((A, B, C), E), (F, G)), L)   |
| 2-06       | ((((A, C), B, E), F), L)        | ((A, B, C, E), F), L)           | ((((A, C), B, E), F), L)      | ((A, B, C, E), F), L)           |
| 2-07       | (A, B, C, E, F, G), L)          | ((A, B, C, E), F, G), L)        | (A, B, C, E, F, G), L)        | ((A, B, C, E), F, G), L)        |

|                   |                                 |                                 |                               |                                 |
|-------------------|---------------------------------|---------------------------------|-------------------------------|---------------------------------|
| 2-08              | (((((A, B, C), E), F), G), L)   | ((((A, B, C, E), F), G), L)     | ((((A, B, C, E), F), G), L)   | ((((A, B, C, E), F), G), L)     |
| 2-09              | ((((A, B, C), E), F, G), L)     | ((((A, B, C), E), F, G), L)     | ((((A, B, C), E), F, G), L)   | ((((A, B, C), E), F), G), L)    |
| 3-01              | ((((A, (B, C), E), F), G), L)   | ((((A, (B, C), E), F), G), L)   | ((((A, (B, C), E), F), G), L) | ((((A, (B, C), E), F), G), L)   |
| 3-02              | ((((A, B, C, E), F), L)         | ((((A, B, C, E), F), L)         | ((((A, B, C, E), F), L)       | ((((A, B, C, E), F), L)         |
| 3-03              | ((((A, B), C), E, F, G), L)     | ((((A, B), C), E, F, G), L)     | ((((A, B), C), E, F, G), L)   | ((((A, B), C), E, F, G), L)     |
| 3-04              | (((((A, C), B), E), F, G), L)   | (((((A, C), B), E), F, G), L)   | (((((A, C), B, E), F, G), L)  | (((((A, C), B, E), (F, G)), L)  |
| 3-05              | (((((A, B, C, E), F), G), L)    | (((((A, B, C, E), F), G), L)    | (((((A, B, C, E), F), G), L)  | (((((A, B, C, E), F), G), L)    |
| 3-06 <sup>†</sup> | (((((A, B, C), E), G), F), L)   | (((((A, B, C), E), G), F), L)   | (((((A, B, C, E), F), G), L)  | (((((A, B, C), E), G), F), L)   |
| 3-07              | ((((A, B, C), E), F, G), L)     | (((((A, B, C), E), G), F), L)   | ((((A, B, C), E, F, G), L)    | ((((A, B, C), E), F, G), L)     |
| 3-08              | (((((A, C), (B, E)), F), G), L) | (((((A, C), (B, E)), F), G), L) | ((((A, C, (B, E)), F, G), L)  | ((((A, (B, E), C), F, G), L)    |
| 3-09              | (((((A, C), B), E), F, G), L)   | (((((A, C), B), E), F, G), L)   | (((((A, C, B), E), F, G), L)  | (((((A, C), B), E), F, G), L)   |
| 3-10              | ((A, (B, C)), E)                | ((A, (B, C)), E)                | ((A, B, C), E)                | ((A, (B, C)), E)                |
| 3-11              | ((A, C), B), E)                 | ((A, C), B), E)                 | ((A, C), B), E)               | ((A, C), B), E)                 |
| 3-12              | ((A, B, C, E), F, G), L)        | ((A, B, C, E), F, G), L)        | ((A, B, C, E), F, G), L)      | ((A, B, C, E), F, G), L)        |
| 3-13              | (((((A, B, C), E), F), G), L)   | (((((A, B, C), E), F), G), L)   | (((((A, B, C), E), F), G), L) | (((((A, B, C), E), F), G), L)   |
| 4-01              | ((((A, G), B, C, E), F), L)     | ((((A, G), B, C, E), F), L)     | ((((A, G), B, C, E), F), L)   | ((((A, G), B, C, E), F), L)     |
| 4-02              | (((((A, B), C), E), F, G), L)   | (((((A, B), C), E), F, G), L)   | ((((A, B, C), E, G, F), L)    | (((((A, B), C), E), F, G), L)   |
| 4-03              | ((((A, B, C), E), F, G), L)     | ((((A, B, C), E), F, G), L)     | ((((A, B, C, E), F), G), L)   | ((((A, B, C), E), F, G), L)     |
| 4-04              | (((((A, B), C), E), (F, G)), L) | (((((A, B), C), E), F, G), L)   | ((((A, B, C, E), (F, G)), L)  | (((((A, B), C), E), (F, G)), L) |
| 4-05              | ((((A, (B, E)), C), F, G), L)   | ((((A, B, E), C), F, G), L)     | ((((A, (B, E)), C), F, G), L) | ((((A, B, E), C), F, G), L)     |
| 4-06              | (((((A, B), C), E), F), G), L)  | (((((A, B), C), E), F), G), L)  | (((((A, B, C), E), F), G), L) | (((((A, B, C), E), F), G), L)   |
| 4-07              | (((((A, B), C), E), F), G)      | (((((A, B), C), E), F), G)      | (((((A, B), C), E), F), G)    | (((((A, B), C), E), F), G)      |
| 4-08              | (((((A, C), B), E, F), G), L)   | ((((A, C), B), E, F, G), L)     | ((((A, B, C), E, F, G), L)    | (((((A, C), B), E, F), G), L)   |
| 4-09              | (((((A, B), C, E), F), G), L)   | (((((A, B), E), C), F), G), L)  | ((((A, B), C, E), F, G), L)   | (((((A, B), C, E), F), G), L)   |
| 4-10              | (((((A, (B, C)), E), F), G), L) | ((((A, (B, C), E), F), G), L)   | ((A, (B, C), E, F, G), L)     | ((((A, (B, C), E), F), G), L)   |
| 4-11              | ((((A, B, C, E), G), F), L)     | ((((A, B, C, E), G), F), L)     | ((A, B, C, E), F, G), L)      | ((A, B, C, E), F, G), L)        |
| 4-12              | ((((A, B), C, E), F, G), L)     | ((A, B, C, E), F, G), L)        | ((((A, B), (C, E)), F, G), L) | ((A, B, C, E), F, G), L)        |
| 5-01              | ((A, B, C, E, G), F), L)        | ((A, B, C, E, F, G), L)         | ((A, B, C, E, G, F), L)       | ((A, B, C, E), G), F), L)       |

|                   |                                    |                                    |                                   |                                   |
|-------------------|------------------------------------|------------------------------------|-----------------------------------|-----------------------------------|
| 5-02              | (( (A, B, C, E), F, G), L)         | (( (A, B, C, E), F, G), L)         | (( A, B, E, C, F, G), L)          | (( (A, B, C, E), F, G), L)        |
| 5-03              | (( (( (A, B), E), C), F, G), L)    | (( ((( (A, B), E), C), G), F), L)  | (( A, B, E, C, F, G), L)          | (( (( (A, B, E), C), F, G), L)    |
| 5-04              | (( (( (A, B), C, E), F), G)        | (( (A, B, (C, E)), F), G)          | (( (A, B, C, E), F), G)           | (( (A, B, (C, E)), F), G)         |
| 5-05              | (( (A, B, C, E), F, G), L)         | (( (A, B, C, E), F, G), L)         | (( (A, B, C, E), F, G), L)        | (( (A, B, C, E), F, G), L)        |
| 5-06              | (( (A, B, (C, E)), F, G), L)       | (( (A, B, (C, E)), F, G), L)       | (( (A, B, (C, E)), G, F), L)      | (( (A, (B, (C, E))), F, G), L)    |
| 5-07              | (( (A, B, C, E), (F, G)), L)       | (( (A, B, C, E), (F, G)), L)       | (( (A, E, C, B), (F, G)), L)      | (( (A, B, C, E), (F, G)), L)      |
| 5-08              | (( (( (A, B, C, E), G), F), L)     | (( (( (A, B, C, E), G), F), L)     | (( (( (A, B, C, E), G), F), L)    | (( (A, B, C, E), F, G), L)        |
| 5-09              | (( ((( (A, B), C), E), F, G), L)   | (( ((( (A, B, C), E), F), G), L)   | (( (( (A, B), C, E), F, G), L)    | (( (( (A, B, C), E), F, G), L)    |
| 5-10              | (( ((( (A, B), C), E), F, G), L)   | (( ((( (A, B), C), E), F), G), L)  | (( (A, B, C, E), F, G), L)        | (( ((( (A, B), C), E), F, G), L)  |
| 5-11              | (( (A, B, C, E, G), F), L)         | (( (A, B, C, E, G), F), L)         | (( (A, B, C, E, G), F), L)        | (( (A, B, C, E, G), F), L)        |
| 5-12 <sup>†</sup> | (( (A, C), B, E), F)               | (( (A, C), B, E), F)               | (( (( (A, C), E), B), F)          | (( (A, C), (B, E)), F)            |
| 5-13              | (( (A, C, E), (F, G)), L)          | (( (( (A, E), C), (F, G)), L)      | (( (A, C, E), (F, G)), L)         | (( (A, C, E), (F, G)), L)         |
| 5-14              | (( (A, C), B), E)                  | (( (A, C), B), E)                  | (( (A, C), B), E)                 | (( (A, C), B), E)                 |
| 6-01              | (( (A, B, C), F, G), L)            | (( (A, B, C), F, G), L)            | (( (A, B, C), (F, G)), L)         | (( (( (A, B), C), F, G), L)       |
| 6-02              | (( (( (A, B, C, E), F), G), L)     | (( (( (A, B, C, E), F), G), L)     | (( (A, B, C, E), F, G), L)        | (( (( (A, B, C, E), F), G), L)    |
| 6-03              | (( (( (A, B), C, E), (F, G)), L)   | (( (( (A, B), C, E), F, G), L)     | (( (A, B, C, E), (F, G)), L)      | (( (A, B, C, E), (F, G)), L)      |
| 6-04              | (( ((( (A, B), C), E), F, G), L)   | (( ((( (A, B), C), E), F, G), L)   | (( (( (A, B, C), E), F, G), L)    | (( (( (A, B, C), E), F, G), L)    |
| 6-05              | (( (A, (B, C), E), (F, G)), L)     | (( (A, (B, C), E), (F, G)), L)     | (( (A, (B, C), E), (F, G)), L)    | (( (A, (B, C), E), (F, G)), L)    |
| 6-06              | (( (A, B, C, E), (F, G)), L)       | (( (A, B, C, E), (F, G)), L)       | (( A, B, C, E, F, G), L)          | (( (A, B, C, E), (F, G)), L)      |
| 6-07              | (( (( (A, E), (B, C)), F, G), L)   | (( (A, (B, C), E), F, G), L)       | (( (A, E, (B, C)), F, G), L)      | (( (( (A, E), (B, C)), G), F), L) |
| 6-08              | (( (( (A, B, C), E), F, G), L)     | (( ((( (A, B, C), E), G), F), L)   | (( (A, B, C), E, F, G), L)        | (( ((( (A, C), B), E), G), F), L) |
| 6-09              | (( (A, B, C, E), F, G), L)         | (( (A, B, C, E), F, G), L)         | (( (A, C, B, E, F), G), L)        | (( (( (A, C), B, E), F, G), L)    |
| 6-10              | (( ((( (A, C), (B, E)), F), G), L) | (( ((( (A, C), (B, E)), F), G), L) | (( (( (A, C), (B, E)), F, G), L)  | (( (( (A, C), B, E), F, G), L)    |
| 6-11 <sup>†</sup> | (( (( (A, B, C), E), F, G), L)     | (( ((( (A, B, C), E), F), G), L)   | (( (A, C, B, E), (F, G)), L)      | (( ((( (A, C), B), E), F), G), L) |
| 6-12              | (( A, (B, C, E)), G)               | (( A, (B, C, E)), G)               | (( A, (B, C, E)), G)              | (( A, (B, (C, E))), G)            |
| 6-13              | (( ((( (A, B, E), C), G), F), L)   | (( ((( (A, B, E), C), G), F), L)   | (( (( (A, B, E, C), G), F), L)    | (( ((( (A, B, E), C), G), F), L)  |
| 7-01              | (( (A, (B, (C, E))), F), G)        | (( (A, (B, (C, E))), F), G)        | (( A, (B, (C, E))), F), G)        | (( A, (B, (C, E))), F), G)        |
| 7-02              | (( ((( (A, B, C), E), G), F), L)   | (( ((( (A, B), C), E), G), F), L)  | (( ((( (A, B), C), E), G), F), L) | (( ((( (A, B), C), E), G), F), L) |

|      |                                  |                                  |                                 |                                |
|------|----------------------------------|----------------------------------|---------------------------------|--------------------------------|
| 7-03 | ((A, B, C), F)                   | ((A, B, C), F)                   | ((A, C, B), F)                  | ((A, B, C), F)                 |
| 7-04 | (( (A, B, C), E), F)             | (( (A, B, C), E), F)             | (( (A, B, C), E), F)            | (( (A, B, C), E), F)           |
| 7-05 | (( (A, B, C, E), F, G), L)       | (( (A, B, C, E), F, G), L)       | (( (A, B, C, E), F, G), L)      | (( (A, B, C, E), F, G), L)     |
| 7-06 | (( ((A, C), B, E), F), G), L)    | (( ((A, C), B, E), F), G), L)    | (( ((A, C, B, E), F), G), L)    | (( ((A, C), B, E), F), G), L)  |
| 7-07 | (( ((A, (B, (C, E))), G), F), L) | (( ((A, (B, (C, E))), G), F), L) | (( (A, (B, C, E))), G, F), L)   | (( ((A, B, C, E), G), F), L)   |
| 7-08 | (( ((A, C), (B, E)), F, G), L)   | (( ((A, C), (B, E)), F, G), L)   | (( ((A, C), (B, E))), G, F), L) | (( ((A, C), (B, E)), F, G), L) |
| 7-09 | (( (A, B, C, E), F, G), L)       | (( (A, B, C, E), F, G), L)       | (( (A, B, C, E), F, G), L)      | (( (A, B, C, E), F, G), L)     |
| 8-01 | (( ((A, B, C, E), F), G), L)     | (( (A, B, C, E), F, G), L)       | (( (A, B, C, E, F), G), L)      | (( (A, B, C, E), F, G), L)     |
| 8-02 | (( (A, B, C), F), L)             | (( (A, B, C), F), L)             | (( (A, B, C), F), L)            | (( (A, B, C), F), L)           |
| 8-03 | (( (A, B, C, E), F, G), L)       | (( (A, B, C, E), F, G), L)       | (( (A, B, C, E), F, G), L)      | (( ((A, B, C), E), (F, G)), L) |
| 8-04 | (( ((A, (B, C)), E), F), G), L)  | (( ((A, (B, C)), E), F), G), L)  | (( ((A, B, C), E), F), G), L)   | (( ((A, B, C), E), F), G), L)  |
| 8-05 | (( (A, B, C), E, F, G), L)       | (( (A, (B, C)), E, F, G), L)     | (( (A, B, C, E, F, G), L)       | (( (A, B, C), (E, F), G), L)   |
| 8-06 | (( (A, C), B), G)                | (( (A, C), B), G)                | (( (A, C), B), G)               | (( (A, C), B), G)              |
| 8-07 | (( ((A, B, C), E), F), G)        | (( (A, B, C, E), F), G)          | (( ((A, B, C), E), F), G)       | (( (A, B, C, E), F), G)        |
| 8-08 | (( (A, G), B, C, E, F), L)       | (( ((A, G), C), B, E), F), L)    | (( (A, G), C, B, E, F), L)      | (( ((A, G), C), B, E), F), L)  |
| 8-09 | (( ((A, C), B), F, G), L)        | (( ((A, C), B), F, G), L)        | (( (A, C, B), F, G), L)         | (( ((A, C), B), F, G), L)      |
| 8-10 | (( ((A, B), C), E), (F, G)), L)  | (( ((A, B), C), E), F, G), L)    | (( (A, B, C, E), (F, G)), L)    | (( ((A, B, C), E), F, G), L)   |
| 8-11 | (( ((A, B), C), E), F, G), L)    | (( ((A, B), C), E), F, G), L)    | (( ((A, B), C), E), G), F), L)  | (( ((A, B), C), E), F, G), L)  |
| 8-12 | (( ((A, B, C), E), G), F), L)    | (( ((A, B, C), E), G), F), L)    | (( ((A, B, C), E), G), F), L)   | (( ((A, B, C), E), G), F), L)  |
| 9-01 | (( ((A, B, C), E), F, G), L)     | (( (A, B, C, E), F, G), L)       | (( ((A, B, C), E), F), G), L)   | (( (A, B, C, E), F, G), L)     |
| 9-02 | (( (A, B, C, E), F, G), L)       | (( ((A, (B, (C, E))), G), F), L) | (( (A, B, C, F, G, E), L)       | (( (A, B, C, E), F, G), L)     |
| 9-03 | (( (A, B, C), (F, G)), L)        | (( (A, B, C), F, G), L)          | (( (A, B, C), (F, G)), L)       | (( (A, (B, C)), (F, G)), L)    |
| 9-04 | (( (A, B, C, E), (F, G)), L)     | (( (A, B, C, E), (F, G)), L)     | (( (A, B, C, E), (F, G)), L)    | (( (A, B, C, E), (F, G)), L)   |
| 9-05 | (( ((A, B), E), C, (F, G)), L)   | (( ((A, B), E), C, (F, G)), L)   | (( ((A, B), E), C, (F, G)), L)  | (( ((A, B), E), C, (F, G)), L) |
| 9-06 | (( ((A, B, C), G), E), L)        | (( (A, B, C), E, G), L)          | (( ((A, B, C), G), E), L)       | (( ((A, B), C), G), E), L)     |
| 9-07 | (( ((A, B), C, E), F, G), L)     | (( (A, B, C, E), F, G), L)       | (( (A, B, C, E), F, G), L)      | (( (A, B, C, E), F, G), L)     |
| 9-08 | (( ((A, B), C), E), F, G), L)    | (( ((A, B), C), E), F, G), L)    | (( ((A, B, C), E), F, G), L)    | (( ((A, B), C), E), F, G), L)  |
| 9-09 | (( ((A, C), B), E), F), G), L)   | (( ((A, C), B), E), F), G), L)   | (( ((A, C), B), E), F), G), L)  | (( ((A, C), B), E), F), G), L) |

|                    |                                 |                                 |                                 |                                 |
|--------------------|---------------------------------|---------------------------------|---------------------------------|---------------------------------|
| 9-10               | (((((A, C, E), B), F), G), L)   | ((((A, C, E), B), F, G), L)     | ((((A, C, E), B), G, F), L)     | (((((A, C, E), B), F), G), L)   |
| 10-01              | ((((A, B, C, E), G), F), L)     | ((((A, B, C, E), G), F), L)     | (( (A, B, C, E), F, G), L)      | (( ((A, B, C, E), G), F), L)    |
| 10-02              | (( (A, C), B), E)               | (( (A, C), B), E)               | (( (A, C), B), E)               | (( (A, C), B), E)               |
| 10-03              | ((A, B, C), E)                  | ((A, B, C), E)                  | ((A, B, C), E)                  | ((A, B, C), E)                  |
| 10-04              | ((((A, C, E), B), G), L)        | ((((A, C, E), B), G), L)        | ((((A, C, E), B), G), L)        | ((((A, C, E), B), G), L)        |
| 10-05              | (((((A, B), C), E), F), G)      | (((((A, B), C), E), F), G)      | (((((A, B, C), E), F), G)       | (((((A, B), C), E), F), G)      |
| 10-06              | ((((A, B, C, E), F), G), L)     | ((((A, B, C, E), F, G), L)      | ((((A, B, C, E), F), G), L)     | (( ((A, (B, C)), E), F, G), L)  |
| 10-07              | (((((A, B, C), E), F), G), L)   | (((((A, B, C), E), F, G), L)    | (( (A, B, C), E, F, G), L)      | (( ((A, B, C), E), F, G), L)    |
| 10-08              | (((((A, E), C), B, G), F), L)   | (((((A, E), C), B, G), F), L)   | (( (A, E, C), B, F, G), L)      | (((((A, E), B, C), G), F), L)   |
| 10-09              | ((A, B, C, E), L)               | ((A, B, C, E), L)               | ((A, B, C, E), L)               | ((A, B, C, E), L)               |
| 10-10              | (( (A, B), C), E)               | (( (A, B), C), E)               | (( (A, B), C), E)               | (( (A, B), C), E)               |
| 10-11 <sup>†</sup> | (((((A, B), C, E), F, G), L)    | (((((A, B), C, E), F, G), L)    | (((((A, B), C, E), (F, G)), L)  | (((((A, B, C, E), F), G), L)    |
| 11-01              | (( (A, B, C, E), G), L)         | (( (A, B, C, E), G), L)         | (( (A, B, C, E), G), L)         | (( (A, B, C, E), G), L)         |
| 11-02              | ((((A, E), (B, C)), F, G), L)   | (( (A, E), (B, C), F, G), L)    | (( (A, E), (B, C), F, G), L)    | (( (A, E), (B, C), F, G), L)    |
| 11-03              | ((((A, B, C), E), F, G), L)     | ((((A, B, C), E), F, G), L)     | ((((A, B, C), E), F, G), L)     | (( ((A, B, C), E), F, G), L)    |
| 11-04              | ((((A, B), C, E), F, G), L)     | ((((A, B), C, E), F, G), L)     | (( (A, B, C, E), F, G), L)      | (( (A, B, C, E), F, G), L)      |
| 11-05              | ((((A, C), (B, E)), (F, G)), L) | ((((A, C), (B, E)), (F, G)), L) | ((((A, C), (B, E)), F, G), L)   | ((((A, C), (B, E)), (F, G)), L) |
| 11-06              | (((((A, B), C), E), F), G)      | (((((A, B), C), E), F), G)      | (((((A, B), C), E), F), G)      | (((((A, B), C), E), F), G)      |
| 11-07              | (((((A, B), C, E), G), F), L)   | (((((A, B), C, E), G), F), L)   | (((((A, B), (C, E)), G), F), L) | (((((A, B), (C, E)), G), F), L) |
| 11-08              | (( (A, E), (B, C), F, G), L)    | (( (A, E), (B, C), F, G), L)    | (( (A, E), (B, C), F, G), L)    | (( (A, E), (B, C), F, G), L)    |
| 11-09              | (( (A, B), C), E)               | (( (A, B), C), E)               | (( (A, B), C), E)               | (( (A, B), C), E)               |
| 11-10              | ((((A, B, C), E), F, G), L)     | (((((A, B, C), E), G), F), L)   | ((((A, C, B), E), G, F), L)     | (((((A, B, C), E), G), F), L)   |
| 11-11              | ((((A, (B, C)), E), (F, G)), L) | ((((A, (B, C)), E), (F, G)), L) | (( (A, (B, C), E), F, G), L)    | (( (A, (B, C), E), (F, G)), L)  |
| 11-12              | ((((A, B, E), C), (F, G)), L)   | ((((A, B, E), C), (F, G)), L)   | (( (A, B, C, E), (F, G)), L)    | (((((A, B), E), C), (F, G)), L) |
| 11-13              | (( (A, (B, C), E), F, G), L)    | (( (A, (B, C), E), F, G), L)    | (( (A, B, C, E), G, F), L)      | (( (A, (B, C), E), F, G), L)    |
| 12-01              | ((((A, B, E), C), F, G), L)     | (((((A, B), E), C), F, G), L)   | (( (A, E, B, C), G, F), L)      | (((((A, B), E), C), F, G), L)   |
| 12-02              | ((((A, (B, C)), E), (F, G)), L) | (( (A, (B, C), E), (F, G)), L)  | ((((A, (B, C)), E), (F, G)), L) | ((((A, (B, C)), E), (F, G)), L) |
| 12-03              | (((((A, B), C), G), F), L)      | (((((A, B), C), F, G), L)       | (((((A, B), C), G), F), L)      | (( ((A, B), C), F, G), L)       |

|       |                                |                               |                               |                                |
|-------|--------------------------------|-------------------------------|-------------------------------|--------------------------------|
| 12-04 | (((((A, B, C), E), F), G), L)  | (((((A, B, C), E), F), G), L) | ((((A, B, C), E), F, G), L)   | (((((A, B), C), E), F), G), L) |
| 12-05 | ((((A, (B, C)), E), F, G), L)  | ((((A, (B, C)), E), F, G), L) | ((((A, (B, C), E), G), F), L) | ((((A, (B, C)), E), F, G), L)  |
| 12-06 | ((((A, (B, C, E)), (F, G)), L) | ((((A, B, C, E), (F, G)), L)  | ((A, (B, C, E), (F, G)), L)   | ((((A, B, C, E), (F, G)), L)   |
| 12-07 | ((((A, B, C, E), G), L)        | ((((A, B, C, E), G), L)       | ((((A, B, C, E), G), L)       | ((((A, B, C, E), G), L)        |
| 12-08 | (((((A, B, C), E), F), G), L)  | (((((A, B, C), E), F), G), L) | ((((A, B, C), E), F, G), L)   | ((((A, B, C), E, F), G), L)    |
| 12-09 | ((A, B, C), E)                 | ((A, B, C), E)                | ((A, B, C), E)                | ((A, B, C), E)                 |

\* Numbers are corresponding to gene's ID defined by authors in Additional data files 1 and 2.

† four out of 142 genes yielded incompatible topologies between different methods of analyses in terms of bootstrap 75% majority-rule consensus trees
