# Supplementary material for: Analysis of 142 genes resolves the rapid diversification of the rice genus
Source: PubMed Central journal article supplement (PMC2397501; doi:10.1186/gb-2008-9-3-r49), 2008-03-03
Supplement: gb-2008-9-3-r49-S13.pdf [file gb-2008-9-3-r49-S13.pdf]

**Additional data file 13.** The proportions of topology (or clades) identical to those shown in figure 1 inferred from randomly sampled genes or sites in 500 replicates. The capital letters A, B, C, F, and G represent *Oryza* genome types and R represents the rest of genome types including A, B, C, and E.

| Size of random sample | ML method  |       |       | MP method  |       |       |
|-----------------------|------------|-------|-------|------------|-------|-------|
|                       | Gene tree* | (AB)C | (RF)G | Gene tree* | (AB)C | (RF)G |
| 20 genes              | 0.32       | 0.51  | 0.63  | 0.26       | 0.52  | 0.56  |
| 40 genes              | 0.45       | 0.58  | 0.77  | 0.35       | 0.61  | 0.60  |
| 60 genes              | 0.52       | 0.62  | 0.86  | 0.43       | 0.66  | 0.66  |
| 80 genes              | 0.66       | 0.72  | 0.92  | 0.57       | 0.78  | 0.73  |
| 100 genes             | 0.83       | 0.85  | 0.98  | 0.73       | 0.91  | 0.82  |
| 120 genes             | 0.97       | 0.97  | 1.00  | 0.87       | 0.98  | 0.90  |
| 10 kb                 | 0.53       | 0.68  | 0.76  | 0.38       | 0.68  | 0.60  |
| 20 kb                 | 0.67       | 0.79  | 0.86  | 0.56       | 0.83  | 0.70  |
| 30 kb                 | 0.83       | 0.91  | 0.92  | 0.64       | 0.92  | 0.72  |
| 40 kb                 | 0.91       | 0.95  | 0.96  | 0.75       | 0.97  | 0.80  |
| 50 kb                 | 0.95       | 0.95  | 0.99  | 0.82       | 0.98  | 0.85  |
| 60 kb                 | 0.99       | 0.99  | 1.00  | 0.88       | 1.00  | 0.90  |
| 70 kb                 | 1.00       | 1.00  | 1.00  | 0.91       | 1.00  | 0.92  |
| 80 kb                 | 1.00       | 1.00  | 1.00  | 0.96       | 1.00  | 0.96  |
| 90 kb                 | 1.00       | 1.00  | 1.00  | 0.97       | 1.00  | 0.97  |
| 100 kb                | 1.00       | 1.00  | 1.00  | 0.98       | 1.00  | 0.99  |

\* denotes the gene tree that has identical topology to figure 1.
