# Supplementary material for: Analysis of 142 genes resolves the rapid diversification of the rice genus
Source: PubMed Central journal article supplement (PMC2397501; doi:10.1186/gb-2008-9-3-r49), 2008-03-03
Supplement: gb-2008-9-3-r49-S14.pdf [file gb-2008-9-3-r49-S14.pdf]

**Additional data file 14.** A list of the primers for PCR amplification and GenBank accession numbers of the sequences of 142 loci sampled in the present study.

| ID * | Primer F             | Primer R              | GenBank accession number |                    |                       |                         |                       |                     |                |                   |                      |                      |
|------|----------------------|-----------------------|--------------------------|--------------------|-----------------------|-------------------------|-----------------------|---------------------|----------------|-------------------|----------------------|----------------------|
|      |                      |                       | <i>O. rufipogon</i>      | <i>O. punctata</i> | <i>O. officinalis</i> | <i>O. australiensis</i> | <i>O. brachyantha</i> | <i>O. granulata</i> | <i>Leersia</i> | <i>O. barthii</i> | <i>O. rhizomatis</i> | <i>O. eichingeri</i> |
| 1_01 | TCAGCCACCTTATGTGTTC  | TGTGCAGCAACAACATCCAT  | EF577622                 | EF577623           | EF577624              | EF577625                | EF577626              | EF577627            | EF577628       | ---               | ---                  | ---                  |
| 1_02 | CAAGCGCAAATGTGTTACTG | CCTTCCTCCATCTTCAATG   | EF578231                 | EF578232           | EF578233              | EF578234                | EF578235              | EF578236            | EF578237       | EU503438          | EU503439             | EU503440             |
| 1_03 | CTGCGCAACAATCAGTAG   | ATGGCGTAATGCTGAGGCT   | EF578245                 | EF578246           | EF578247              | EF578248                | EF578249              | EF578250            | EF578251       | EU503441          | EU503442             | EU503443             |
| 1_04 | CACAAGGGCCATGTTTCAGC | CACTGCCAGAAACCAATAG   | EF578259                 | EF578260           | EF578261              | EF578262                | EF578263              | EF578264            | EF578265       | EU503444          | EU503445             | EU503446             |
| 1_05 | TTCCGCTCTCGCTCTCAAG  | CATCAGGAACCCGAAGATAC  | EF578333                 | EF578334           | EF578335              | EF578336                | EF578337              | EF578338            | EF578339       | EU503492          | EU503493             | EU503494             |
| 1_06 | TCACAACGAGCTGCGAGTGG | TCGCTCCATAGTGGGCTCAG  | EF577764                 | EF577765           | EF577766              | EF577767                | EF577768              | EF577769            | EF577770       | EU503495          | EU503496             | EU503497             |
| 1_07 | TTGAAGAGGTCCCGTGTGGT | TTGCCTGCGCTTCTCTTC    | EF577812                 | EF577813           | EF577814              | EF577815                | EF577816              | EF577817            | EF577818       | EU503498          | EU503499             | EU503500             |
| 1_08 | TAAGGAGCCGCTCTGGGTC  | CGTCAGCCTCGGCTTCTG    | EF578314                 | EF578315           | EF578316              | EF578317                | --- †                 | ---                 | EF578318       | EU503447          | EU503448             | EU503449             |
| 1_09 | CCGATGGCTAAAGATGGAGT | AGCTCTGAATACGCCCTAG   | EF577559                 | EF577560           | EF577561              | EF577562                | EF577563              | EF577564            | EF577565       | ---               | ---                  | ---                  |
| 1_10 | TGTTAGCCCTCGTGGAGCAG | GTCCCTCGGCTTCGCATCTG  | EF578075                 | EF578076           | EF578077              | EF578078                | ---                   | EF578079            | EF578080       | EU503501          | EU503502             | EU503503             |
| 1_11 | TATGAGAACTTGAGGAAGGG | CCCATGCATACACCACAACTG | EF577973                 | EF577974           | EF577975              | EF577976                | EF577977              | ---                 | ---            | EU503504          | EU503505             | EU503506             |
| 1_12 | TGATCTCAGTGGCAATGACC | TTCCATCCCAGCTAGCATC   | EF578167                 | EF578168           | EF578169              | EF578170                | EF578171              | EF578172            | EF578173       | ---               | ---                  | ---                  |
| 1_13 | CGAGGAGCATGTTGGATTG  | CCTTTCCTGGAGCTCGAATG  | EF578191                 | EF578192           | EF578193              | EF578194                | ---                   | ---                 | EF578195       | ---               | ---                  | ---                  |
| 1_14 | AGCGTAGCTCTGAGCCATGA | GCCGATTCAATAAGCTGAG   | EF577525                 | EF577526           | EF577527              | EF577528                | EF577529              | EF577530            | EF577531       | ---               | ---                  | ---                  |
| 1_15 | GGAGGAATGAATGGTTACAT | CCACTGTCTTCCATGCCATAG | EF578184                 | EF578185           | EF578186              | EF578187                | EF578188              | EF578189            | EF578190       | ---               | ---                  | ---                  |
| 1_16 | GCGGATAACATGAACTTGG  | ACCGAAAGGCTCAACAAGA   | EF577580                 | EF577581           | EF577582              | EF577583                | EF577584              | EF577585            | EF577586       | ---               | ---                  | ---                  |
| 1_17 | ATGGCCACCTTCGAGCTSTA | TCRCAGGCCACRATCTTAC   | EF577601                 | EF577602           | EF577603              | EF577604                | EF577605              | EF577606            | EF577607       | ---               | ---                  | ---                  |
| 2_01 | GGAGCTTCGGTTTCTTCTGC | GGGGAATGCCAGGGCACTG   | EF577744                 | EF577745           | EF577746              | EF577747                | EF577748              | EF577749            | EF577750       | EU503531          | EU503532             | EU503533             |
| 2_02 | GATGAAGTCCGAAGATCTC  | AATATAAGACTTGGTTGCC   | EF578203                 | EF578204           | EF578205              | EF578206                | EF578207              | EF578208            | EF578209       | ---               | ---                  | ---                  |
| 2_03 | TACACGCAGAGGCTGAAAGG | ATCGGGTCAGCAGGGAAGTC  | EF577799                 | EF577800           | EF577801              | EF577802                | EF577803              | EF577804            | EF577805       | ---               | ---                  | ---                  |

|      |                        |                        |          |          |          |          |          |          |          |          |          |          |
|------|------------------------|------------------------|----------|----------|----------|----------|----------|----------|----------|----------|----------|----------|
| 2_04 | AACTGTGGAGGTTAGCAG     | AAGTCGCTCAGAGGCAGC     | EF577636 | EF577637 | EF577638 | EF577639 | EF577640 | EF577641 | EF577642 | ---      | ---      | ---      |
| 2_05 | CAGGACGTTTCATGTTAGCAGC | TCGTCGCCAAGCAGTTGTC    | EF577664 | EF577665 | EF577666 | EF577667 | EF577668 | EF577669 | EF577670 | ---      | ---      | ---      |
| 2_06 | GCTGGGCCTCAGACACCTAC   | CTCTAGTTTTTTCACGCATATC | EF577806 | EF577807 | EF577808 | EF577809 | EF577810 | ---      | EF577811 | EU503348 | EU503349 | EU503350 |
| 2_07 | GTTGGAGCTGAGGCTTGTGC   | CCAGCGGTGCGAACTTAAC    | EF578252 | EF578253 | EF578254 | EF578255 | EF578256 | EF578257 | EF578258 | EU503450 | EU503451 | EU503452 |
| 2_08 | AGCTACGACTACGACCTGTT   | CAGTTGCTATCAATATGTGC   | EF577629 | EF577630 | EF577631 | EF577632 | EF577633 | EF577634 | EF577635 | ---      | ---      | ---      |
| 2_09 | TTCTGCCGTCGCAAGTTAC    | GCAGTAGCAGCTTCCTCTC    | EF578326 | EF578327 | EF578328 | EF578329 | EF578330 | EF578331 | EF578332 | EU503453 | EU503454 | EU503455 |
| 3_01 | ACCCGCTTCGCTGACCAATG   | TGTCCCAAAAGGCTCTGAG    | EF577985 | EF577986 | EF577987 | EF577988 | EF577989 | EF577990 | EF577991 | EU503507 | EU503508 | EU503509 |
| 3_02 | ACGACAACAGCAATCTGAG    | ATTCATGCCGATAGTTGCTG   | EF578042 | EF578043 | EF578044 | EF578045 | EF578046 | ---      | EF578047 | EU503510 | EU503511 | EU503512 |
| 3_03 | TTGTTGGATTGGGTGAGGC    | GCAAAGCAAACAGGGCAAAC   | EF578081 | EF578082 | EF578083 | EF578084 | EF578085 | EF578086 | EF578087 | EU503513 | EU503514 | EU503515 |
| 3_04 | TGGAATGAGCGAAGGAAGCC   | GCGTGTGATGCCGGGATTC    | EF578146 | EF578147 | EF578148 | EF578149 | EF578150 | EF578151 | EF578152 | EU503516 | EU503517 | EU503518 |
| 3_05 | CCTGAAGCTGAAACAAGAG    | CTTGTGAGATCTTGACGC     | EF578347 | EF578348 | EF578349 | EF578350 | EF578351 | EF578352 | EF578353 | EU503519 | EU503520 | EU503521 |
| 3_06 | TCAAAAATCATCGGCGACAC   | GAACCTCCACTTCCGCTCTC   | EF577966 | EF577967 | EF577968 | EF577969 | EF577970 | EF577971 | EF577972 | EU503432 | EU503433 | EU503434 |
| 3_07 | AAGCCAAGGCACCGTTTC     | GCTGCGCCAGGAAAATC      | EF577978 | EF577979 | EF577980 | EF577981 | EF577982 | EF577983 | EF577984 | ---      | ---      | ---      |
| 3_08 | TGAAGGAGCTGATGGACTG    | AATAATCGAGCGCCCTCAC    | EF577992 | EF577993 | EF577994 | EF577995 | EF577996 | EF577997 | EF577998 | EU503435 | EU503436 | EU503437 |
| 3_09 | GTGGAACAAAGGAGGTGTG    | CCCTAAGATGCCCTCTGAAC   | EF577999 | EF578000 | EF578001 | EF578002 | EF578003 | EF578004 | EF578005 | ---      | ---      | ---      |
| 3_10 | CCTCCTGCGGATCTACGTTC   | TGCTTTACCGAGGCTTCAC    | EF578006 | EF578007 | EF578008 | EF578009 | ---      | ---      | ---      | ---      | ---      | ---      |
| 3_11 | CTGTGATGCCCTGTTATGAT   | GATAAGATCCTTCGCAGACT   | EF578180 | EF578181 | EF578182 | EF578183 | ---      | ---      | ---      | ---      | ---      | ---      |
| 3_12 | GCCCTGATGGAACCTCAAG    | CAAGCCTTTCAGATACTCA    | EF578427 | EF578428 | EF578429 | EF578430 | EF578431 | EF578432 | EF578433 | ---      | ---      | ---      |
| 3_13 | ATGAAGATACTGCAAAACGG   | ATCTCATCTAGCGGAATGT    | EF578406 | EF578407 | EF578408 | EF578409 | EF578410 | EF578411 | EF578412 | ---      | ---      | ---      |
| 4_01 | ACGTCCATGCCCTATCCAAG   | GTCCCTGCGGCGTAATGAG    | EF578340 | EF578341 | EF578342 | EF578343 | EF578344 | EF578345 | EF578346 | ---      | ---      | ---      |
| 4_02 | CCACGAACACAGATTGGATTC  | CCACATCTGATACGCATAAC   | EF578273 | EF578274 | EF578275 | EF578276 | EF578277 | EF578278 | EF578279 | EU503456 | EU503457 | EU503458 |
| 4_03 | GAATTGCAGATGAGGAGCC    | ATACGACTAGGACCATCTGG   | EF577573 | EF577574 | EF577575 | EF577576 | EF577577 | EF577578 | EF577579 | ---      | ---      | ---      |
| 4_04 | TGGCAGAAGAAGTTACGAGG   | CTTGGCAAATCTTTGACAAC   | EF578266 | EF578267 | EF578268 | EF578269 | EF578270 | EF578271 | EF578272 | EU503459 | EU503460 | EU503461 |
| 4_05 | CCTCTGCTGATGGCTACTTG   | GCCTGCAACCTTCTTCTAGT   | EF577532 | EF577533 | EF577534 | EF577535 | EF577536 | EF577537 | EF577538 | ---      | ---      | ---      |
| 4_06 | ACACTCAAGGTTCTCATGGC   | TAGAGAGATCAGCCTTGTC    | EF578280 | EF578281 | EF578282 | EF578283 | EF578284 | EF578285 | EF578286 | EU503462 | EU503463 | EU503464 |
| 4_07 | CTGCTTTCTGGGAGAGTC     | AGTAGGAATAGGCACCAATG   | EF578287 | EF578288 | EF578289 | EF578290 | EF578291 | EF578292 | ---      | EU503465 | EU503466 | EU503467 |

|      |                        |                        |          |          |          |          |          |          |          |          |          |          |
|------|------------------------|------------------------|----------|----------|----------|----------|----------|----------|----------|----------|----------|----------|
| 4_08 | ACAGACACAAGATGCTTTGC   | GAAGAGATGGTAGCACTTGG   | EF578293 | EF578294 | EF578295 | EF578296 | EF578297 | EF578298 | EF578299 | EU503468 | EU503469 | EU503470 |
| 4_09 | TCCAGTTTCCGTGAATCAC    | CCTTGACGACTGCATTAC     | EF577650 | EF577651 | EF577652 | EF577653 | EF577654 | EF577655 | EF577656 | ---      | ---      | ---      |
| 4_10 | TGCAGCAACTTTTCTAAGAC   | TAGGTCATTCTCGTCCAAAG   | EF578307 | EF578308 | EF578309 | EF578310 | EF578311 | EF578312 | EF578313 | EU503471 | EU503472 | EU503473 |
| 4_11 | ATGTTGGATTGCCTGTGTTTC  | TGGGGATCAATAAGGCATTC   | EF578300 | EF578301 | EF578302 | EF578303 | EF578304 | EF578305 | EF578306 | EU503474 | EU503475 | EU503476 |
| 4_12 | GGATTGTGGCAAGCAGGTC    | ATGGCAGCGCGGTCGTAC     | EF578319 | EF578320 | EF578321 | EF578322 | EF578323 | EF578324 | EF578325 | EU503477 | EU503478 | EU503479 |
| 5_01 | ATGGCCACCTTCGAGCTSTA   | TCRCAGGCCACRATCTCAC    | EF577594 | EF577595 | EF577596 | EF577597 | EF577598 | EF577599 | EF577600 | ---      | ---      | ---      |
| 5_02 | GCAAAGAGGGCGACTGCAGA   | GATTTTCATCATCTTTGGTTC  | EF578210 | EF578211 | EF578212 | EF578213 | EF578214 | EF578215 | EF578216 | EU503480 | EU503481 | EU503482 |
| 5_03 | AGGGTGACTTCTGACCTTC    | GCGCCATATTCTGCAATCC    | EF577771 | EF577772 | EF577773 | EF577774 | EF577775 | EF577776 | EF577777 | EU503351 | EU503352 | EU503353 |
| 5_04 | GAGCTTCAGTTCGATAATCAG  | TCGCGTACAACAATTTGCTTTC | EF577826 | EF577827 | EF577828 | EF577829 | EF577830 | EF577831 | ---      | EU503354 | EU503355 | EU503356 |
| 5_05 | AGGGCCACCGAGGGTCTAT    | CACTGCCAAAGTCATTGAAG   | EF577778 | EF577779 | EF577780 | EF577781 | EF577782 | EF577783 | EF577784 | EU503357 | EU503358 | EU503359 |
| 5_06 | GGCCAAAACCTGTGTGAAATG  | GAAGTGGATGGGCCTCTGTG   | EF578196 | EF578197 | EF578198 | EF578199 | EF578200 | EF578201 | EF578202 | EU503483 | EU503484 | EU503485 |
| 5_07 | CAAAGATCCTATCCGCACAG   | AAGCCAGAGCGCCGATGAG    | EF577792 | EF577793 | EF577794 | EF577795 | EF577796 | EF577797 | EF577798 | EU503360 | EU503361 | EU503362 |
| 5_08 | GGCGTTTCCAATGTCCAAG    | TATGAGAATCTCTCCACTG    | EF578217 | EF578218 | EF578219 | EF578220 | EF578221 | EF578222 | EF578223 | EU503486 | EU503487 | EU503488 |
| 5_09 | TGAAGAATCTCCGCTGGAC    | GCAGGTGGATCACGGTAACC   | EF578224 | EF578225 | EF578226 | EF578227 | EF578228 | EF578229 | EF578230 | EU503489 | EU503490 | EU503491 |
| 5_10 | GCAAGAGTACGGACAAATGGTG | GCTTGCTGCTCTGGAAGTAG   | EF577545 | EF577546 | EF577547 | EF577548 | EF577549 | EF577550 | EF577551 | ---      | ---      | ---      |
| 5_11 | ATGCCCCAGCCATTGGATG    | GAAGCGACCCTTGGTGTC     | EF578238 | EF578239 | EF578240 | EF578241 | EF578242 | EF578243 | EF578244 | ---      | ---      | ---      |
| 5_12 | CACTATTGCCCTGCTACTGG   | ATGAATCTGGAAGCCCAATG   | EF578397 | EF578398 | EF578399 | EF578400 | EF578401 | ---      | ---      | ---      | ---      | ---      |
| 5_13 | TGACAGTGATTTTGCTTACG   | CAATGTCGCTTCATCGAAC    | EF578354 | ---      | EF578355 | EF578356 | EF578357 | EF578358 | EF578359 | ---      | ---      | ---      |
| 5_14 | AGGICTCAGGATTACAACGC   | GACCAGCTTTTCGCAATG     | EF578402 | EF578403 | EF578404 | EF578405 | ---      | ---      | ---      | ---      | ---      | ---      |
| 6_01 | GCTGCAAGTGGCCAGAAAT    | CATGTGATTACCACCTCTG    | EF577758 | EF577759 | EF577760 | ---      | EF577761 | EF577762 | EF577763 | EU503522 | EU503523 | EU503524 |
| 6_02 | CTGTCGCTGGATTGGTTGG    | CAAGGAACAGGTATCAACTC   | EF577518 | EF577519 | EF577520 | EF577521 | EF577522 | EF577523 | EF577524 | ---      | ---      | ---      |
| 6_03 | CATCCACAACATCTCCTACCAG | CCAGTCTGCCTTCGATGA     | EF577608 | EF577609 | EF577610 | EF577611 | EF577612 | EF577613 | EF577614 | ---      | ---      | ---      |
| 6_04 | CTGATTGTCAATTTGGCATAG  | CCCCAACATCATCTCCAGAAAG | EF577671 | EF577672 | EF577673 | EF577674 | EF577675 | EF577676 | EF577677 | EU503525 | EU503526 | EU503527 |
| 6_05 | GTTTGTGTGAATGATTGCC    | TCTGTGGATGGGTCCAATC    | EF577657 | EF577658 | EF577659 | EF577660 | EF577661 | EF577662 | EF577663 | ---      | ---      | ---      |
| 6_06 | CCCTCGTCATGGCCTTCCT    | TCGATGTTGCGGTCCAAGC    | EF577730 | EF577731 | EF577732 | EF577733 | EF577734 | EF577735 | EF577736 | EU503528 | EU503529 | EU503530 |
| 6_07 | AAGCGTGCAGAACTGGTTA    | CCACAGGAGCAGCGAGGTG    | EF577737 | EF577738 | EF577739 | EF577740 | EF577741 | EF577742 | EF577743 | ---      | ---      | ---      |

|      |                        |                        |          |          |          |          |          |          |          |          |          |          |
|------|------------------------|------------------------|----------|----------|----------|----------|----------|----------|----------|----------|----------|----------|
| 6_08 | AGCGACGCCTTCTACCACTG   | GGGCAAGGACCATTCAAGTG   | EF578017 | EF578018 | EF578019 | EF578020 | EF578021 | EF578022 | EF578023 | ---      | ---      | ---      |
| 6_09 | CTGTAGTTGTGCTCAATTC    | GCCATCGTCTTGTACATGTC   | EF577643 | EF577644 | EF577645 | EF577646 | EF577647 | EF577648 | EF577649 | ---      | ---      | ---      |
| 6_10 | GAACCTCCACCAAATGTCG    | TCAGAAATAGTCCCGCTCTT   | EF577751 | EF577752 | EF577753 | EF577754 | EF577755 | EF577756 | EF577757 | ---      | ---      | ---      |
| 6_11 | ACATGCCCAATTCAAATGAG   | CAACCTACTCGCCACATTC    | EF578010 | EF578011 | EF578012 | EF578013 | EF578014 | EF578015 | EF578016 | ---      | ---      | ---      |
| 6_12 | CCCAACATCTTAATTCACGA   | AGCCAGAGAAAGCGCAAGAG   | EF578367 | EF578368 | EF578369 | EF578370 | ---      | EF578371 | ---      | ---      | ---      | ---      |
| 6_13 | GCGATAATGTCCCTGGAAT    | CTTCTGCCAAGGGACGCAT    | EF577566 | EF577567 | EF577568 | EF577569 | EF577570 | EF577571 | EF577572 | ---      | ---      | ---      |
| 7_01 | GGGCTAATGTCACAAGATGG   | CGGAATGCAATGGCCTTCTG   | EF578174 | EF578175 | EF578176 | EF578177 | EF578178 | EF578179 | ---      | ---      | ---      | ---      |
| 7_02 | CCGGTCTCTATCTTGTCTG    | ACAGGACCACAACGAAAAT    | EF578160 | EF578161 | EF578162 | EF578163 | EF578164 | EF578165 | EF578166 | ---      | ---      | ---      |
| 7_03 | ATATCTATAACCGGATTGG    | CCTTGCATATAAACTTGCC    | EF577715 | EF577716 | EF577717 | ---      | EF577718 | ---      | ---      | ---      | ---      | ---      |
| 7_04 | CAGTTGAGGCAGAGACTTG    | GCTTCTGCACCCTATTGGA    | EF577678 | EF577679 | EF577680 | EF577681 | EF577682 | ---      | ---      | ---      | ---      | ---      |
| 7_05 | GAGAAGTGGTAGGGGAAAG    | TCCCGCTTGTGTAACATTC    | EF577853 | EF577854 | EF577855 | EF577856 | EF577857 | EF577858 | EF577859 | EU503363 | EU503364 | EU503365 |
| 7_06 | GGGAGATGGCGTTTCTTTC    | ACGCAACAATGTCGCAGCTC   | EF577867 | EF577868 | EF577869 | EF577870 | EF577871 | EF577872 | EF577873 | EU503366 | EU503367 | EU503368 |
| 7_07 | TGGAGGAGGAGCTGTCATTC   | CTGGTCCAGCTTCCTTTGTG   | EF577819 | EF577820 | EF577821 | EF577822 | EF577823 | EF577824 | EF577825 | EU503369 | EU503370 | EU503371 |
| 7_08 | TGCGCGTGTITGGATTGAG    | CAACCCGTGAGTCTCTGTGTC  | EF577839 | EF577840 | EF577841 | EF577842 | EF577843 | EF577844 | EF577845 | EU503372 | EU503373 | EU503374 |
| 7_09 | CCTGGATCTTTTTGGTGATGAG | TTCTTGATCCCGTAACCCACAG | EF577832 | EF577833 | EF577834 | EF577835 | EF577836 | EF577837 | EF577838 | EU503375 | EU503376 | EU503377 |
| 8_01 | TTCGAAAAGCTTCTAGTGTC   | ACATCATGCCGTACAAGGAC   | EF577880 | EF577881 | EF577882 | EF577883 | EF577884 | EF577885 | EF577886 | EU503378 | EU503379 | EU503380 |
| 8_02 | AGGACCCGTCGCTCACCTTC   | CGCGAGCGGCCGTGAAGAT    | EF578024 | EF578025 | EF578026 | ---      | EF578027 | ---      | EF578028 | ---      | ---      | ---      |
| 8_03 | CCAGTTCAGCGAGATCGTG    | CCCTTCAGATTCAAGCAACC   | EF578360 | EF578361 | EF578362 | EF578363 | EF578364 | EF578365 | EF578366 | ---      | ---      | ---      |
| 8_04 | GTGGATTCTGGAGGAAACGC   | GCATTGTGGGCAGCCATATT   | EF577683 | EF577684 | EF577685 | EF577686 | EF577687 | EF577688 | EF577689 | ---      | ---      | ---      |
| 8_05 | TCCATTGCCAGAAGTATGA    | TCTCCATTGCGATGAGTCCT   | EF577708 | EF577709 | EF577710 | EF577711 | EF577712 | EF577713 | EF577714 | ---      | ---      | ---      |
| 8_06 | TGGGCTGAGGCTGTAGGGAT   | GTCTTCGGCTCGCCATCGTG   | EF578372 | EF578373 | EF578374 | ---      | ---      | EF578375 | ---      | ---      | ---      | ---      |
| 8_07 | CTGATGTTGATTGGATTATGG  | AGGATGTCGTGGCTTGAAGTA  | EF577539 | EF577540 | EF577541 | EF577542 | EF577543 | EF577544 | ---      | ---      | ---      | ---      |
| 8_08 | AGAGGCAGCAGATAAGAACCAG | CCATAGGACGCATTTGTGAGAA | EF577587 | EF577588 | EF577589 | EF577590 | EF577591 | EF577592 | EF577593 | ---      | ---      | ---      |
| 8_09 | CGATGAAGGGGCACAACCAG   | CTCCTCCGGTGATCTCGTG    | EF578088 | EF578089 | EF578090 | ---      | EF578091 | EF578092 | EF578093 | ---      | ---      | ---      |
| 8_10 | CTCCTGATGATGATTGTGAG   | GAAGGTGACCACGGGCAAGT   | EF578048 | EF578049 | EF578050 | EF578051 | EF578052 | EF578053 | EF578054 | ---      | ---      | ---      |
| 8_11 | GGACGAGGTGTGGCGGGACT   | TTCAGCTTCCAACCTCCATTG  | EF578055 | EF578056 | EF578057 | EF578058 | EF578059 | EF578060 | EF578061 | ---      | ---      | ---      |

|       |                       |                       |          |          |          |          |          |          |          |          |          |          |
|-------|-----------------------|-----------------------|----------|----------|----------|----------|----------|----------|----------|----------|----------|----------|
| 8_12  | GCGCTTAAAGATAGGCTGAT  | GGGCTATTGAGATTGATGAG  | EF577860 | EF577861 | EF577862 | EF577863 | EF577864 | EF577865 | EF577866 | EU503381 | EU503382 | EU503383 |
| 9_01  | GAGCTTAATCTCCCAAATTC  | ATGATGCCCGATCTCGAAAG  | EF577846 | EF577847 | EF577848 | EF577849 | EF577850 | EF577851 | EF577852 | EU503384 | EU503385 | EU503386 |
| 9_02  | GGAATGCGACAAGAATTGTC  | TCGGCTGGACAATGGCAAAG  | EF577887 | EF577888 | EF577889 | EF577890 | EF577891 | EF577892 | EF577893 | EU503387 | EU503388 | EU503389 |
| 9_03  | CCATCAAGGATACGCAAGAG  | CCCCTCATATCCATAACCTT  | EF577874 | EF577875 | EF577876 | ---      | EF577877 | EF577878 | EF577879 | EU503390 | EU503391 | EU503392 |
| 9_04  | CGGCTATCCAATCTTGAAG   | AGTTCTGCCTCTAGTTCGTC  | EF577933 | EF577934 | EF577935 | EF577936 | EF577937 | EF577938 | EF577939 | EU503393 | EU503394 | EU503395 |
| 9_05  | ACTTCTATTGCGAGCTATG   | ACCCAATCTTGTGGCTTTC   | EF578413 | EF578414 | EF578415 | EF578416 | EF578417 | EF578418 | EF578419 | ---      | ---      | ---      |
| 9_06  | GCGCAGGCAAATAAACCGAC  | ACCGGTAGCTGTCACCATTC  | EF577953 | EF577954 | EF577955 | EF577956 | ---      | EF577957 | EF577958 | EU503396 | EU503397 | EU503398 |
| 9_07  | CCCGTCAATACTGTACTTGC  | AGGCCCGAGTAAGTACTGC   | EF578390 | EF578391 | EF578392 | EF578393 | EF578394 | EF578395 | EF578396 | ---      | ---      | ---      |
| 9_08  | GTCATCATGGCATCCGACAC  | AGTATGGCGGGTAGATGGTC  | EF577940 | EF577941 | EF577942 | EF577943 | EF577944 | EF577945 | EF577946 | EU503399 | EU503400 | EU503401 |
| 9_09  | GATAGCTGGAGCTGTTACTT  | CTCAGGCCCTGTTACAT     | EF577697 | EF577698 | EF577699 | EF577700 | EF577701 | EF577702 | EF577703 | ---      | ---      | ---      |
| 9_10  | CACGCACAACAACCCGAATG  | TGGATGGTTAATGCCGGTCT  | EF578376 | EF578377 | EF578378 | EF578379 | EF578380 | EF578381 | EF578382 | ---      | ---      | ---      |
| 10_01 | CTTCTGGAAGGCTCTCAAG   | TGGATCCACTGGCTGGTAAC  | EF578104 | EF578105 | EF578106 | EF578107 | EF578108 | EF578109 | EF578110 | ---      | ---      | ---      |
| 10_02 | TGAAAGTGTTCCAGCAGGAG  | ATCTGCCGTTTTTATTCAG   | EF578122 | EF578123 | EF578124 | EF578125 | ---      | ---      | ---      | ---      | ---      | ---      |
| 10_03 | AGAATCCAAATGCCGCTCTG  | AATTCCTGTACGCCTGCTG   | EF578118 | EF578119 | EF578120 | EF578121 | ---      | ---      | ---      | ---      | ---      | ---      |
| 10_04 | TTCTGTATGCTGCCAAGAG   | TAATTCATGGGCTCCAAC    | EF577947 | EF577948 | EF577949 | EF577950 | ---      | EF577951 | EF577952 | EU503402 | EU503403 | EU503404 |
| 10_05 | GGCCCGCAGCAACCGTTATC  | TCGGCGTGAACCGGAGAAG   | EF578133 | EF578134 | EF578135 | EF578136 | EF578137 | EF578138 | ---      | ---      | ---      | ---      |
| 10_06 | TGGACTGCAGGTTGGATCTG  | TAAATCAGCCAGGGAAGAG   | EF577894 | EF577895 | EF577896 | EF577897 | EF577898 | EF577899 | EF577900 | EU503405 | EU503406 | EU503407 |
| 10_07 | TCTTCTGGGCCCTAATTTATC | TGGCAGATTCGTATGGAGTTG | EF577906 | EF577907 | EF577908 | EF577909 | EF577910 | EF577911 | EF577912 | EU503408 | EU503409 | EU503410 |
| 10_08 | TGCATTTGGAGAGAGCATC   | ATGTGACCACCACGCGATCT  | EF578153 | EF578154 | EF578155 | EF578156 | EF578157 | EF578158 | EF578159 | ---      | ---      | ---      |
| 10_09 | TCTGGCATCGTTTGTGTTCT  | ATTTCCAGGCTGCTGAATC   | EF577901 | EF577902 | EF577903 | EF577904 | ---      | ---      | EF577905 | EU503411 | EU503412 | EU503413 |
| 10_10 | GAGCGTCTAATGCGAATTGTC | AGGCAATGATCTTATCGTTC  | EF577704 | EF577705 | EF577706 | EF577707 | ---      | ---      | ---      | ---      | ---      | ---      |
| 10_11 | AGACATGGAACAGAACTCC   | CATCAGAACACATTATGGC   | EF577615 | EF577616 | EF577617 | EF577618 | EF577619 | EF577620 | EF577621 | ---      | ---      | ---      |
| 11_01 | ACGGAAGTTCTGCTTGTGT   | AAGTCTTTCTCGGCTTCTC   | EF578029 | EF578030 | EF578031 | EF578032 | ---      | EF578033 | EF578034 | EU503426 | EU503427 | EU503428 |
| 11_02 | AGTTGAGCTGCCATTGACAG  | CCCGTAAGCCTAACCTTGAC  | EF578035 | EF578036 | EF578037 | EF578038 | EF578039 | EF578040 | EF578041 | EU503429 | EU503430 | EU503431 |
| 11_03 | CACACCGACGCTACTTCTG   | TCAGCAAGTACCTAAATTATC | AF148569 | AF148577 | AF148579 | AF148589 | AF148598 | AF148597 | AF148600 | ---      | ---      | ---      |
| 11_04 | CACACCGACGCTACTTCTG   | CCACCGTTGGTCATCTCAAT  | AF148603 | AF148611 | AF148613 | AF148623 | AF148632 | AF148631 | AY792581 | ---      | ---      | ---      |

|       |                      |                       |          |          |          |          |          |          |          |          |          |          |
|-------|----------------------|-----------------------|----------|----------|----------|----------|----------|----------|----------|----------|----------|----------|
| 11_05 | ACTTTGGGTGGCCCTCTTC  | TCCGCTTATCCTTGCAAC    | EF578068 | EF578069 | EF578070 | EF578071 | EF578072 | EF578073 | EF578074 | ---      | ---      | ---      |
| 11_06 | GCGCTTGATTGCATCGTTG  | GAAGCGTTTTCTCATTAC    | EF578094 | EF578095 | EF578096 | EF578097 | EF578098 | EF578099 | ---      | ---      | ---      | ---      |
| 11_07 | CGCGTGAACCTACTGCTGTG | TGCTGGCCCTGCTGATGAAC  | EF578139 | EF578140 | EF578141 | EF578142 | EF578143 | EF578144 | EF578145 | ---      | ---      | ---      |
| 11_08 | CATGCAGGCTGATGAGG    | CTTCTTCTGGTAATGCTCT   | EF577785 | EF577786 | EF577787 | EF577788 | EF577789 | EF577790 | EF577791 | ---      | ---      | ---      |
| 11_09 | GTCATTGAGGCTGGATTACC | ATCCTTCTCATCGCCTCAG   | EF578100 | EF578101 | EF578102 | EF578103 | ---      | ---      | ---      | ---      | ---      | ---      |
| 11_10 | TTTCAGCAACCATAGAG    | GCAGACGACAGTAGTTGTC   | EF577690 | EF577691 | EF577692 | EF577693 | EF577694 | EF577695 | EF577696 | ---      | ---      | ---      |
| 11_11 | CAAGGGTTTTGTGCACAAG  | TGACAGAATGCTGATACGCT  | EF577719 | EF577720 | EF577721 | EF577722 | EF577723 | EF577724 | EF577725 | ---      | ---      | ---      |
| 11_12 | CGCTTCAGTTAAGGCAATAG | TTGAAGTATGGCAAGACAAG  | EF578126 | EF578127 | EF578128 | EF578129 | EF578130 | EF578131 | EF578132 | ---      | ---      | ---      |
| 11_13 | AGTGACCAAGTCCCGAGAAC | TCACAAATGACAGGTCCC    | EF578383 | EF578384 | EF578385 | EF578386 | EF578387 | EF578388 | EF578389 | ---      | ---      | ---      |
| 12_01 | AGGCAATCCGGTTACACCTG | AGCAGGGCAAAGACTTGATG  | EF578111 | EF578112 | EF578113 | EF578114 | EF578115 | EF578116 | EF578117 | ---      | ---      | ---      |
| 12_02 | CATTTACATAGCTGGGAGTC | ACCATAACAAGGACTCCACTG | EF577552 | EF577553 | EF577554 | EF577555 | EF577556 | EF577557 | EF577558 | ---      | ---      | ---      |
| 12_03 | CTACATCGTGTGGACGCAC  | CTGCAACAATGCGACTTTTC  | EF578062 | EF578063 | EF578064 | ---      | EF578065 | EF578066 | EF578067 | ---      | ---      | ---      |
| 12_04 | GTGCCAGACACTCTACCT   | CTGTGCGGCTCTAAGGAATC  | EF577913 | EF577914 | EF577915 | EF577916 | EF577917 | EF577918 | EF577919 | EU503414 | EU503415 | EU503416 |
| 12_05 | GAAAAGCAGGTGCCAATCAT | TCCCAGCCAATGGTGAAGTG  | EF577920 | EF577921 | EF577922 | EF577923 | EF577924 | EF577925 | EF577926 | EU503417 | EU503418 | EU503419 |
| 12_06 | GAAGGGGAGAAGTTCTACC  | AATGATGGAACCGCTTGCAC  | EF578420 | EF578421 | EF578422 | EF578423 | EF578424 | EF578425 | EF578426 | ---      | ---      | ---      |
| 12_07 | TGAAGTTGCCGCCAGACAG  | TCGGTCTCGGAATTGATCTC  | EF577927 | EF577928 | EF577929 | EF577930 | ---      | EF577931 | EF577932 | EU503420 | EU503421 | EU503422 |
| 12_08 | CCTTTGCTGAACTGGAAGAG | GCTTGACAAATCCCGTATG   | EF577959 | EF577960 | EF577961 | EF577962 | EF577963 | EF577964 | EF577965 | EU503423 | EU503424 | EU503425 |
| 12_09 | GCTGGAGATAGCTGACAAGT | GGTCGAAGGTTAGGGTTC    | EF577726 | EF577727 | EF577728 | EF577729 | ---      | ---      | ---      | ---      | ---      | ---      |

\* corresponding to gene's ID defined by authors in Additional data files 1 and 2.

† not available
